# 1 **STING mediates immune responses in a unicellular choanoflagellate**

2

3 Arielle Woznica<sup>1\*</sup>, Ashwani Kumar<sup>2</sup>, Carolyn R. Sturge<sup>1</sup>, Chao Xing<sup>2</sup>, Nicole King<sup>3</sup>, Julie  
4 K. Pfeiffer<sup>1\*</sup>

5

6 <sup>1</sup> Department of Microbiology, University of Texas Southwestern Medical Center, Dallas  
7 TX 75390, USA

8 <sup>2</sup> McDermott Center Bioinformatics Lab, University of Texas Southwestern Medical  
9 Center, Dallas TX, USA

10 <sup>3</sup> Howard Hughes Medical Institute, and Department of Molecular and Cell Biology,  
11 University of California, Berkeley, Berkeley, CA 94720, USA.

12

13 \*Correspondence: [Arielle.Woznica@UTSouthwestern.edu](mailto:Arielle.Woznica@UTSouthwestern.edu) and  
14 [Julie.Pfeiffer@UTSouthwestern.edu](mailto:Julie.Pfeiffer@UTSouthwestern.edu)

15

16

17

## 18 **Abstract**

19

20 Animals have evolved unique repertoires of innate immune genes and pathways that  
21 provide their first line of defense against pathogens. To reconstruct the ancestry of  
22 animal innate immunity, we have developed the choanoflagellate *Monosiga brevicollis*,  
23 one of the closest living relatives of animals, as a model for studying mechanisms  
24 underlying pathogen recognition and immune response. We found that *M. brevicollis* is  
25 killed by exposure to *Pseudomonas aeruginosa* bacteria and selectively avoids  
26 ingesting them. Moreover, *M. brevicollis* expresses STING, which, in animals, activates  
27 innate immune pathways in response to cyclic dinucleotides during pathogen sensing.  
28 *M. brevicollis* STING increases the susceptibility of *M. brevicollis* to *P. aeruginosa*-  
29 induced cell death and is required for responding to the cyclic dinucleotide 2'3' cGAMP.  
30 Furthermore, similar to animals, autophagic signaling in *M. brevicollis* is induced by 2'3'  
31 cGAMP in a STING-dependent manner. This study provides evidence for a pre-animal  
32 role for STING in antibacterial immunity and establishes *M. brevicollis* as a model  
33 system for the study of immune responses.

34

35

36

37

38

39

40

## 41 Introduction

42

43 Innate immunity is the first line of defense against pathogens for all animals, in  
44 which it is crucial for distinguishing between self and non-self, recognizing and  
45 responding to pathogens, and repairing cellular damage. Some mechanisms of animal  
46 immunity have likely been present since the last common eukaryotic ancestor, including  
47 RNAi, production of antimicrobial peptides, and the production of nitric oxide<sup>1,2</sup>.  
48 However, many gene families that play critical roles in animal innate immune responses  
49 are unique to animals<sup>3</sup>.

50 Comparing animals with their closest relatives, the choanoflagellates, can  
51 provide unique insights into the ancestry of animal immunity and reveal other key  
52 features of the first animal, the ‘Urmetazoan’<sup>4–6</sup>. Choanoflagellates are microbial  
53 eukaryotes that live in diverse aquatic environments and survive by capturing and  
54 phagocytosing diverse environmental bacteria<sup>7</sup> using their “collar complex,” an apical  
55 flagellum surrounded by actin-filled microvilli (Fig. 1A)<sup>7,8</sup>. Several innate immune  
56 pathway genes once considered to be animal-specific are present in choanoflagellates,  
57 including cGAS and STING, both of which are crucial for innate responses to cytosolic  
58 DNA in animals (Fig. S1)<sup>3,9,10</sup>. Although the phylogenetic distribution of these gene  
59 families reveals that they first evolved before animal origins, their functions in  
60 choanoflagellates and their contributions to the early evolution of animal innate  
61 immunity are unknown.

62 STING (stimulator of interferon genes) is a signaling protein that activates innate  
63 immune responses to cytosolic DNA during bacterial or viral infection<sup>11,12</sup>. Although  
64 STING homologs are conserved in diverse invertebrate and vertebrate animals  
65 (reviewed in Margolis et al. 2017)<sup>9,13,14</sup>, mechanisms of STING activation are best  
66 understood in mammals. In mammals, STING is activated by binding 2’3’ cGAMP, an  
67 endogenous cyclic dinucleotide produced by the sensor cGAS (cyclic GMP-AMP  
68 synthase) upon detecting cytosolic DNA<sup>15–20</sup>. In addition, cyclic dinucleotides produced  
69 by bacteria can also activate STING<sup>17,21</sup>. Importantly, STING domain-containing  
70 systems are present in bacteria, and eukaryotic STING-like proteins may have been  
71 acquired from lateral gene transfer<sup>22</sup>. Comparative genomics suggests that STING  
72 domains arose at least three independent times in eukaryotes, including once in the  
73 stem lineage leading to Choanozoa, the clade containing animals and  
74 choanoflagellates<sup>22</sup>.

75 Choanoflagellates have already served as powerful models for studying the  
76 origin of animal multicellularity and cell differentiation<sup>10,23–28</sup> and are ideally positioned to  
77 yield insights into the evolution of animal immune pathways. Therefore, we sought to  
78 establish the choanoflagellate *Monosiga brevicollis* as a model for studying pathogen  
79 recognition and immune responses. Here, we report that *Pseudomonas aeruginosa*  
80 bacteria are pathogenic for *M. brevicollis*. Through our study of interactions between *P.*

81 *aeruginosa* and *M. brevicollis*, we determine that STING functions in the  
82 choanoflagellate antibacterial response. In addition, we demonstrate that STING is  
83 necessary for mediating responses to the STING agonist 2'3' cGAMP *in vivo*, and that  
84 2'3' cGAMP induces STING-dependent autophagic signaling. Our results demonstrate  
85 that key features of STING-mediated immune responses are conserved in *M.*  
86 *brevicollis*, thereby expanding our understanding of the pre-metazoan ancestry of  
87 STING signaling.

88

## 89 **Results**

90

### 91 ***P. aeruginosa* has pathogenic effects on *M. brevicollis***

92

93 One impediment to studying immune responses in choanoflagellates has been  
94 the lack of known choanoflagellate pathogens. While bacteria are obligate prey and can  
95 regulate mating, multicellular development, and cell contractility in choanoflagellates, to  
96 our knowledge no bacteria with pathogenic effects have been described<sup>23,26,27,29–31</sup>. For  
97 this study, we focused on the choanoflagellate *Monosiga brevicollis*, which has a  
98 sequenced genome<sup>4</sup>, grows robustly under laboratory conditions in co-culture with  
99 *Flavobacterium* prey bacteria<sup>5</sup>, and expresses a clear homolog of STING<sup>3,9</sup>. To identify  
100 potential pathogens of choanoflagellates, we screened select bacteria – including  
101 environmental isolates and known animal pathogens and commensals (Table 1) – to  
102 test whether any of these induced *M. brevicollis* behavioral changes or reduced cell  
103 survival.

104 After co-culturing *M. brevicollis* with bacteria for 24 hours, only the  
105 gammaproteobacterium *Pseudomonas aeruginosa*, a ubiquitous environmental  
106 bacterium and opportunistic pathogen of diverse eukaryotes<sup>32–35</sup>, altered the behavior  
107 and growth dynamics of *M. brevicollis*. Under standard laboratory conditions, *M.*  
108 *brevicollis* is a highly motile flagellate and swims up in the water column (Movie 1).  
109 However, after 12-14 hours in the presence of *P. aeruginosa* strains PAO1 and PA14, a  
110 large proportion of *M. brevicollis* cells settled to the bottom of the culture dish (Movie 2).  
111 Immunofluorescence staining revealed that *M. brevicollis* cells exposed to *P.*  
112 *aeruginosa* had truncated flagella compared to cells exposed to *E. coli* or other bacteria  
113 that did not induce cell settling (Fig. 1B). To determine the effects of *P. aeruginosa* on  
114 cell viability, we added *P. aeruginosa* strain PAO1 or control gammaproteobacteria to  
115 *M. brevicollis* and monitored cell density over the course of 72 hours (Fig. 1C). While *M.*  
116 *brevicollis* continued to proliferate in the presence of control gammaproteobacteria,  
117 exposure to *P. aeruginosa* PAO1 resulted in cell death.

118 Choanoflagellates prey upon bacteria and ingest them through phagocytosis<sup>7,8</sup>.  
119 However, many bacterial pathogens have evolved strategies to prevent or resist  
120 phagocytosis by eukaryotic cells<sup>36,37</sup>. Therefore, we examined whether exposure to *P.*

121 *aeruginosa* alters *M. brevicollis* phagocytic uptake. To track phagocytosis, we added  
122 GFP-expressing *E. coli* DH5 $\alpha$  (Fig. 1D) or *P. aeruginosa* PAO1 (Fig. 1E) to *M.*  
123 *brevicollis* and monitored the cultures by live imaging. After one hour, while 92% of *M.*  
124 *brevicollis* cells incubated with *E. coli*-GFP had GFP+ food vacuoles, only 3% of cells  
125 incubated with PAO1-GFP had GFP+ food vacuoles (Fig. 1F).

126 Next, to determine if *P. aeruginosa* broadly disrupts *M. brevicollis* phagocytosis  
127 or if *M. brevicollis* specifically avoids ingestion of *P. aeruginosa*, we incubated *M.*  
128 *brevicollis* with GFP-expressing PAO1 or GFP-expressing *E. coli* for one hour, and then  
129 added 0.2  $\mu$ m fluorescent beads for an additional 30 minutes as an independent  
130 measure of phagocytic activity. The fraction of *M. brevicollis* cells with internalized 0.2  
131  $\mu$ m beads was similar in cultures incubated with *E. coli* DH5 $\alpha$  and PAO1 (Fig. 1G).  
132 Moreover, exposure to *P. aeruginosa* did not inhibit phagocytic uptake of *E. coli* (Fig.  
133 1H). These results suggest that exposure to *P. aeruginosa* does not broadly alter  
134 phagocytosis, but rather that *M. brevicollis* specifically avoids ingesting *P. aeruginosa*.

135 We next investigated the effects of secreted *P. aeruginosa* molecules on *M.*  
136 *brevicollis* viability. Exposure of *M. brevicollis* to conditioned medium from *P. aeruginosa*  
137 PAO1 or diverse non-pathogenic gammaproteobacteria revealed that PAO1 conditioned  
138 medium is sufficient to induce cell death (Fig. 1I). Similar to live bacteria, exposure to *P.*  
139 *aeruginosa* conditioned medium led to reduced motility and truncated flagella in *M.*  
140 *brevicollis* after approximately 10 hours. Because numerous *P. aeruginosa* secreted  
141 virulence factors have been characterized<sup>32,38</sup>, we screened a battery of isogenic PAO1  
142 strains with deletions in known virulence genes to determine if any of these factors  
143 contribute to the pathogenic effects on *M. brevicollis* (Table 2). All strains tested induced  
144 similar levels of *M. brevicollis* cell death as the parental PAO1 strain, suggesting that  
145 none of the deleted virulence genes alone are essential for pathogenesis in *M.*  
146 *brevicollis*. These results suggest that other *P. aeruginosa* virulence factors are required  
147 for inducing cell death in *M. brevicollis*.

148

## 149 **Upregulation of *M. brevicollis* STING in response to *P. aeruginosa***

150

151 To identify potential genetic pathways activated by *M. brevicollis* in response to  
152 pathogenic bacteria, we performed RNA-seq on *M. brevicollis* exposed to conditioned  
153 medium from either *P. aeruginosa* or *Flavobacterium sp.*, the non-pathogenic bacterial  
154 strain used as a food source (Table 1). We found that 674 genes were up-regulated  
155 and 232 genes were downregulated two-fold or greater ( $FDR \leq 10^{-4}$ ) upon *P. aeruginosa*  
156 exposure compared to cells exposed to *Flavobacterium* (Fig. 2A). The up-regulated  
157 genes were enriched in biological processes including response to stress, endocytosis,  
158 microtubule-based movement, mitochondrial fission, and carbohydrate metabolism.  
159 Genes down-regulated in response to *P. aeruginosa* were enriched in biological  
160 processes including RNA modification and metabolism (Fig. S2A). We also found that

161 the transcription of several genes encoding proteins that function in animal antibacterial  
162 innate immunity was upregulated in response to *P. aeruginosa*, including C-type lectin,  
163 glutathione peroxidase, and STING (Fig. 2A,B). Using an antibody we raised against the  
164 C-terminal portion of *M. brevicollis* STING (Fig. S2B) we found that STING protein  
165 levels are also elevated in response to *P. aeruginosa* (Fig. 2C). Given the importance of  
166 STING in animal immunity and its upregulation in response to *P. aeruginosa*, we  
167 pursued its functional relevance in the *M. brevicollis* pathogen response.

## 168 169 **The cyclic dinucleotide 2'3' cGAMP induces elevated expression of STING in *M.*** 170 ***brevicollis***

171  
172 The predicted domain architecture of *M. brevicollis* STING consists of four  
173 transmembrane domains followed by a cytosolic STING domain (Fig. 3A, Fig. S2C), and  
174 likely matches the structure of the ancestral animal STING protein. Vertebrate STING  
175 proteins contain a C-terminal tail (CTT; Fig. 3A, Fig. S2C) that is required for the  
176 induction of interferons<sup>39–41</sup>, and for the activation of other downstream responses,  
177 including NFκB<sup>42</sup> and autophagy<sup>43–45</sup> pathways. Both the STING CTT and interferons  
178 evolved in vertebrates and it is currently unclear how choanoflagellate and invertebrate  
179 STING proteins mediate downstream immune responses<sup>13,46</sup>. The conservation of  
180 putative cyclic dinucleotide-binding residues in *M. brevicollis* STING (Fig. 3B) led us to  
181 hypothesize that *P. aeruginosa* could induce STING by producing bacterial cyclic  
182 dinucleotides<sup>12,17,21</sup>. In addition, because *M. brevicollis* has a cGAS-like enzyme (Fig.  
183 S1A), it is also possible that *P. aeruginosa* exposure could lead to the production of an  
184 endogenous cyclic dinucleotide<sup>9,12,47</sup>.

185 To identify potential STING inducers<sup>49,50</sup>, we treated *M. brevicollis* with purified  
186 immune agonists, including mammalian cGAMP (2'3' cGAMP) and bacterial cyclic  
187 dinucleotides (3'3' c-di-GMP, 3'3' c-di-AMP, 3'3' cGAMP). We first performed dose-  
188 response curves to determine if the different cyclic dinucleotides affect the viability of *M.*  
189 *brevicollis* (Fig. 3C). Interestingly, we found that exposure to 2'3' cGAMP induced cell  
190 death in a dose-dependent manner. In contrast, exposure to 3'3' cGAMP, c-di-GMP,  
191 and c-di-AMP did not alter *M. brevicollis* survival. Transcriptional profiling of *M.*  
192 *brevicollis* exposed to 2'3' cGAMP or 3'3' cGAMP for three hours revealed that *STING*  
193 mRNA levels increase in response to 2'3' cGAMP, but remain unchanged in response  
194 to 3'3'cGAMP (Fig. S3A-C). Therefore, we next treated *M. brevicollis* with the cyclic  
195 dinucleotides for five hours, and measured STING protein levels by immunoblot (Fig.  
196 3D). Treatment with 2'3' cGAMP, but not the bacterially-produced cyclic dinucleotides,  
197 led to elevated levels of STING protein compared to unstimulated cells. A time course of  
198 2'3' cGAMP treatment revealed that STING protein levels increase as early as three  
199 hours after exposure to the cyclic dinucleotide and remain elevated for at least 7 hours,  
200 approximately one cell cycle (Fig. 3E). While we also observed sustained upregulation

201 of STING in the presence of *P. aeruginosa*, this is markedly different from what has  
202 been described in mammals, wherein STING activation results in its translocation to  
203 lysosomes and degradation<sup>45</sup>. In addition, immunostaining for STING in fixed *M.*  
204 *brevicollis* revealed that the number and intensity of STING puncta increases after  
205 exposure to 2'3' cGAMP (Fig. S3E,F). These data suggest that *M. brevicollis* STING  
206 responds to 2'3' cGAMP, and that this cyclic dinucleotide can be used to further  
207 characterize the role of STING in *M. brevicollis*.

208

## 209 **Transfection reveals that STING localizes to the *M. brevicollis* endoplasmic** 210 **reticulum**

211

212 A key barrier to investigating gene function in *M. brevicollis* has been the  
213 absence of transfection and reverse genetics. We found that the transfection protocol  
214 recently developed for the choanoflagellate *Salpingoeca rosetta*<sup>48</sup> was not effective in  
215 *M. brevicollis*, but by implementing a number of alterations to optimize reagents and  
216 conditions (see Methods) we were able to achieve both reproducible transfection and  
217 establishment of stable cell lines in *M. brevicollis*.

218 To investigate the subcellular localization of STING, we established a robust  
219 transfection protocol for *M. brevicollis* that would allow the expression of fluorescently-  
220 labeled STING along with fluorescent subcellular markers for different organelles.  
221 We observed that STING-mTFP protein localized to tubule-like structures around the  
222 nucleus (Fig. 4A) similar to what was observed by immunostaining with an antibody to  
223 STING (Fig. S3E,F). We then co-transfected STING-mTFP alongside fluorescent  
224 reporters marking the endoplasmic reticulum (ER) or mitochondria (Fig. 4B,C) and  
225 performed live-cell imaging. STING-mTFP co-localized with a fluorescent marker  
226 highlighting the ER (Fig. 4B). Thus, as in mammalian cells<sup>15,49</sup>, STING localizes to  
227 regions of the ER in *M. brevicollis*.

228

## 229 **Genetic disruption of STING reveals its role in responding to 2'3' cGAMP and *P.*** 230 ***aeruginosa***

231

232 The establishment of transfection facilitated genome editing in *M. brevicollis*.  
233 Disrupting the *STING* locus using CRISPR/Cas9-mediated genome editing (Fig. 5A)  
234 enabled us to investigate the function of STING. To overcome low gene editing  
235 efficiencies in *M. brevicollis*, we based our gene editing strategy on a protocol recently  
236 developed for *S. rosetta* that simultaneously edits a gene of interest and confers  
237 cycloheximide resistance<sup>50</sup>. By selecting for cycloheximide resistance and then  
238 performing clonal isolation, we were able to isolate a clonal cell line that has a deletion  
239 within the *STING* locus that introduces premature stop codons (Fig. S5A). We were  
240 unable to detect STING protein in *STING*<sup>-</sup> cells by immunoblot (Fig. 5B). Wild type and

241 *STING*<sup>-</sup> cells have similar growth kinetics (Fig. S5B), suggesting that STING is not  
242 required for cell viability under standard laboratory conditions. In addition,  
243 overexpression of STING-mTFP did not affect *M. brevicollis* viability.

244 To investigate the connection between 2'3' cGAMP and STING signaling in *M.*  
245 *brevicollis*, we exposed *STING*<sup>-</sup> cells to increasing concentrations of 2'3' cGAMP. In  
246 contrast to wild type *M. brevicollis*, *STING*<sup>-</sup> cells are resistant to 2'3' cGAMP-induced  
247 cell death (Fig. 5C). The 2'3' cGAMP resistance phenotype could be partially reversed  
248 by stably expressing STING within the *STING*<sup>-</sup> mutant background (Fig. 5D). In addition,  
249 *STING*<sup>-</sup> cells fail to induce a strong transcriptional response to 2'3' cGAMP compared  
250 to wild type cells (Fig. 5E, Fig. S3A, Fig. S5C,D). While 371 genes are differentially  
251 expressed in wild type cells after exposure to 2'3' cGAMP for three hours, only 28  
252 genes are differentially expressed in *STING*<sup>-</sup> cells (FC  $\geq 3$ ; FDR  $\leq 10^{-4}$ ). Thus, 2'3'  
253 cGAMP induces a STING-dependent transcriptional response in *M. brevicollis*.

254 Interestingly, of the 22 choanoflagellate species with sequenced  
255 transcriptomes<sup>3,27</sup>, only *M. brevicollis* and *Salpingoeca macrocollata*, express homologs  
256 of both STING and cGAS (Fig. S1A, Fig. 5F, Fig. S5E). Therefore, we were curious  
257 whether other choanoflagellate species are able to respond to 2'3' cGAMP in the  
258 absence of a putative STING protein. We exposed four other choanoflagellate species  
259 (*Salpingoeca infusionum*, *S. macrocollata*, *S. rosetta*, and *Salpingoeca punica*) to  
260 increasing 2'3' cGAMP concentrations, and quantified survival after 24 hours (Fig. 5G).  
261 Of these additional species, only *S. macrocollata* had impaired survival in the presence  
262 of 2'3' cGAMP. Thus, it is possible that STING also responds to 2'3' cGAMP in *S.*  
263 *macrocollata*.

264 We next asked whether *STING*<sup>-</sup> cells have altered responses to other immune  
265 agonists. Although *M. brevicollis* is continuously co-cultured with feeding bacteria, we  
266 observed that treatment with high concentrations of *E. coli* lipopolysaccharides induces  
267 cell death (Fig. S5F). As LPS is not known to activate STING signaling, we treated wild  
268 type and *STING*<sup>-</sup> cells with LPS to probe the specificity of STING-mediated immune  
269 responses in *M. brevicollis*. The survival responses of wild type and *STING*<sup>-</sup> cells to  
270 LPS were indistinguishable (Fig. 5H), suggesting that there are separable pathways for  
271 responding to 2'3' cGAMP and LPS. We also examined the survival of *STING*<sup>-</sup> cells  
272 exposed to *P. aeruginosa* conditioned medium (Fig. 5I, Fig. S5G). In growth curve  
273 experiments, *P. aeruginosa* hindered the growth rate and stationary phase cell density  
274 of *STING*<sup>-</sup> cells compared to *Flavobacterium* (Fig. S5G). However, *STING*<sup>-</sup> cells were  
275 still able to divide in the presence of *P. aeruginosa*, whereas wild type cell growth was  
276 completely restricted (Figure 5I). These results indicate that wild type cells are more  
277 susceptible to *P. aeruginosa* than *STING*<sup>-</sup> cells, although it is unclear how STING  
278 contributes to *P. aeruginosa*-induced growth restriction and cell death.

279  
280

## 281 **2'3' cGAMP-induces autophagic signaling via STING**

282

283 One downstream consequence of STING signaling in animals is the initiation of  
284 autophagy<sup>21,43,44,47,51</sup>. Based on viral infection studies in *D. melanogaster*<sup>51</sup> and  
285 experiments expressing invertebrate STING in mammalian cells<sup>43</sup>, it has been  
286 proposed that the induction of autophagy may be an interferon-independent 'ancestral'  
287 function of STING. Although *M. brevicollis* lacks many effectors required for immune  
288 responses downstream of STING in animals (including TBK1 and NF- $\kappa$ B; Figure S1A),  
289 autophagy machinery is well conserved in *M. brevicollis*. Therefore, we asked if one  
290 outcome of 2'3' cGAMP exposure in *M. brevicollis* is the induction of autophagy.

291 The evolutionarily conserved protein Atg8/LC3 is a ubiquitin-like protein that can  
292 be used to monitor autophagy<sup>52,53</sup>. During autophagosome formation, unmodified Atg8,  
293 called Atg8-I, is conjugated to phosphatidylethanolamine. Lipidated Atg8, called Atg8-II,  
294 remains associated with growing autophagosomes. As such, two indicators of  
295 autophagy are elevated Atg8-II levels relative to Atg8-I and increased formation of  
296 Atg8+ autophagosome puncta. Because antibodies are not available to detect  
297 endogenous *M. brevicollis* autophagy markers or cargo receptors, we generated wild  
298 type and *STING*<sup>-</sup> cell lines stably expressing mCherry-Atg8. Expression of mCherry-  
299 Atg8 did not alter the relative susceptibilities of these cell lines to 2'3'cGAMP (Fig. S6A).  
300 By immunoblot, mCherry-Atg8-II can be distinguished from mCherry-Atg8-I based on its  
301 enhanced gel mobility. When we exposed both cell lines to 2'3' cGAMP for three hours,  
302 we observed increased levels of Atg8-II relative to Atg8-I by immunoblot in wild type, but  
303 not *STING*<sup>-</sup> cells (Fig. 6A). These results suggest that treatment with 2'3' cGAMP  
304 induces autophagic signaling in a STING-dependent manner; however, making this  
305 conclusion requires evidence of autophagy induction through inhibitor studies. To  
306 confirm autophagy induction, we treated cells with chloroquine, a lysosomotropic agent  
307 which inhibits autophagy by blocking endosomal acidification, thereby preventing  
308 amphisome formation and Atg8-II turnover<sup>52</sup>. Exposing wild type cells pretreated with  
309 chloroquine to 2'3' cGAMP for three hours resulted in increased levels of Atg8-II relative  
310 to Atg8-I, suggesting that 2'3' cGAMP treatment indeed induces the autophagic  
311 pathway (Fig. 6B, Fig. S6B). In cells pretreated with chloroquine, STING levels did not  
312 markedly increase after exposure to 2'3' cGAMP (Fig. S6B). We next examined  
313 whether 2'3' cGAMP induces Atg8+ puncta formation by treating wild type and *STING*<sup>-</sup>  
314 cells with 2'3' cGAMP for three hours, and observing mCherry foci by microscopy (Fig.  
315 6C-F). Quantifying images revealed that Atg8+ puncta accumulate after 2'3' cGAMP  
316 treatment in wild type, but not *STING*<sup>-</sup> cells (Fig. 6G). Overall, these results suggest that  
317 *M. brevicollis* responds to 2'3' cGAMP through STING-dependent induction of the  
318 autophagy pathway.

319

320



## 321 Discussion

322

323 Investigating choanoflagellate immune responses has the potential to inform the  
324 ancestry of animal immune pathways. In this study, we screened bacteria to identify a  
325 choanoflagellate pathogen, and determined that *M. brevicollis* is killed by exposure to *P.*  
326 *aeruginosa* bacteria and selectively avoids ingesting them. We found that STING, a  
327 crucial component of animal innate responses to cytosolic DNA, is upregulated in *M.*  
328 *brevicollis* after exposure to *P. aeruginosa* or the STING ligand 2'3' cGAMP. Developing  
329 transgenic and genetic tools for *M. brevicollis* revealed that, similar to mammalian  
330 STING, *M. brevicollis* STING localizes to perinuclear endoplasmic reticulum regions. In  
331 addition, STING mediates responses to *P. aeruginosa* bacteria, and is required for  
332 inducing transcriptional changes and autophagic signaling in response to 2'3' cGAMP.  
333 These data reveal that STING plays conserved roles in choanoflagellate immune  
334 responses, and provide insight into the evolution of STING signaling on the animal stem  
335 lineage.

336 Future characterization of *M. brevicollis* STING will further elucidate its  
337 physiological roles in choanoflagellates. For example, while our results demonstrate that  
338 *M. brevicollis* STING responds to exogenous 2'3' cGAMP, the endogenous mechanisms  
339 by which STING is activated in *M. brevicollis* remain to be determined. *M. brevicollis* has  
340 a putative cGAS homolog, suggesting that STING may respond to an endogenously  
341 produced cyclic dinucleotide similar to 2'3' cGAMP, though further studies are required  
342 to determine whether this enzyme synthesizes cyclic dinucleotides, and identify  
343 ligand(s), such as dsDNA, that bind *M. brevicollis* cGAS. Although cGAS and STING  
344 are rare among sequenced choanoflagellate species, both species with STING  
345 homologs, *M. brevicollis* and *S. macrocollata*, also harbor a cGAS homolog (Fig. S1A),  
346 raising the possibility that a cGAS-STING pathway is present in some choanoflagellates

347 Our results suggest that *M. brevicollis* has distinct responses to 2'3' cGAMP  
348 versus 3'3'-linked cyclic dinucleotides produced by bacteria (Fig. 3C,D, Fig. S3). In  
349 contrast to 2'3' cGAMP, bacterial cyclic dinucleotides (3'3' cGAMP, c-di-AMP, c-di-  
350 GMP) do not induce cell death in *M. brevicollis*. However, 3'3' cGAMP induces a robust  
351 transcriptional response in *M. brevicollis* (Fig. S3B,C), indicating that STING, or a  
352 different cyclic dinucleotide receptor<sup>54</sup>, responds to these bacterial molecules. One  
353 hypothesis is that *M. brevicollis* STING, similar to animal STING proteins<sup>14</sup>, may have  
354 different binding affinities for 2'3' and 3'3'-linked cyclic dinucleotides. It is also possible  
355 that bacterial cyclic dinucleotides activate additional pathways that influence survival in  
356 *M. brevicollis*. As bacterivores, choanoflagellates likely benefit from a fine-tuned  
357 response to bacterial cyclic dinucleotides that enables them to interpret higher and  
358 lower concentrations in their environment. Elucidating mechanisms of STING activation  
359 in *M. brevicollis* could also lend understanding to how STING proteins in animals  
360 evolved to respond to both bacterially-produced and endogenous cyclic dinucleotides.

361 How STING initiates downstream responses in choanoflagellates is another area  
362 for further inquiry. Much of what is known about STING signaling comes from mammals  
363 and involves immune genes that are restricted to vertebrates. However, two pathways  
364 downstream of STING activation that are also present in invertebrates, and as such are  
365 proposed 'ancestral' functions of STING, are autophagy and NF- $\kappa$ B signaling. Here, we  
366 observed that exposure to 2'3' cGAMP induces autophagy in *M. brevicollis*, and that  
367 STING is required for autophagic pathway induction (Fig. 6). These data indicate that  
368 the role of STING in regulating autophagy predates animal origins. STING acts  
369 upstream of NF- $\kappa$ B in response to bacterial and viral challenge in insects<sup>28,48-50</sup>, and 2'3'  
370 cGAMP-treatment induces the expression of NF- $\kappa$ B in *N. vectensis*<sup>55</sup>. While NF- $\kappa$ B  
371 homologs are detected in several choanoflagellate species, the role of NF- $\kappa$ B in  
372 choanoflagellates has not been studied, and neither *M. brevicollis* nor *S. macrocollata*,  
373 the two choanoflagellate species with STING, possess a NF- $\kappa$ B homolog<sup>3</sup>. This does  
374 not negate the hypothesis that STING signaling led to NF- $\kappa$ B activation in the  
375 Urmetazoan, but strongly suggests that additional pathways exist downstream of STING  
376 activation in choanoflagellates, and potentially in animals.

377 Choanoflagellates forage on diverse environmental bacteria for sustenance, yet  
378 how they recognize and respond to pathogens is a mystery. Our finding that *P.*  
379 *aeruginosa* has pathogenic effects on *M. brevicollis* (Fig. 1) provides a much needed  
380 framework for uncovering mechanisms of antibacterial immunity in choanoflagellates.  
381 Moreover, the discovery that *M. brevicollis* specifically avoids ingesting *P. aeruginosa*  
382 will facilitate investigating how choanoflagellates sense bacterial prey for phagocytosis.  
383 Identifying specific *P. aeruginosa* virulence factors will provide additional tools for  
384 investigating choanoflagellate pathogen responses. While profiling the host  
385 transcriptional response to *P. aeruginosa* has already allowed us to identify  
386 choanoflagellate genes that may be involved in recognizing (C-type lectins) and  
387 combating (polysaccharide lysases, antimicrobial peptides) bacteria, hundreds of  
388 uncharacterized and choanoflagellate-specific genes are also differentially expressed in  
389 response *P. aeruginosa*, and further study of these genes has the potential to reveal  
390 new mechanisms of eukaryotic immunity.

391 With the establishment of molecular genetic techniques in choanoflagellates --  
392 first for *S. rosetta*<sup>48,50</sup>, and here for *M. brevicollis* -- we now have the opportunity to  
393 explore the functions of candidate immune genes. Identifying additional  
394 choanoflagellate pathogens, particularly viral pathogens, will also be key to delineating  
395 immune response pathways. Finally, as choanoflagellates are at least as genetically  
396 diverse as animals<sup>3</sup>, expanding studies of immune responses to diverse  
397 choanoflagellate species will be essential for reconstructing the evolution of immune  
398 pathways in animals.

399  
400

## 401 Acknowledgements

402

403 We thank Bill Jackson, Tera Levin, Shally Margolis, Russell Vance, and Nan Yan  
404 for helpful advice and/or comments on the manuscript, and David Greenberg, David  
405 Hendrixson, Andrew Koh, and Kim Orth for bacterial strains. We thank Neal Alto for use  
406 of the widefield microscope, Monika Sigg for use of a reporter construct, and Mya  
407 Breitbart for sea water samples. We are grateful for David Booth's invaluable advice on  
408 developing transfection and gene editing protocols.

409 This work was funded by a Pew Innovation Fund award (JKP and NK), a HHMI  
410 Hanna Gray Fellows award (AW), a HHMI Faculty Scholar award (JKP), a Burroughs  
411 Wellcome Fund Investigators in the Pathogenesis of Infectious Diseases (JKP), and  
412 HHMI Investigator award (NK). We acknowledge the assistance of the UT Southwestern  
413 Live Cell Imaging Facility, a Shared Resource of the Harold C. Simmons Cancer  
414 Center, supported in part by an NCI Cancer Center Support Grant, 1P30 CA142543-01.

415

416

417

## 418 Methods

419

### 420 Culturing *M. brevicollis*

421 All strains of *M. brevicollis* were co-cultured with *Flavobacterium sp. bacteria*<sup>4</sup>  
422 (American Type Culture Collection [ATCC], Manassas, VA; Cat. No. PRA-258) in a  
423 seawater based media enriched with glycerol, yeast extract, peptone and cereal grass  
424 (details in Media Recipes). Cells were grown either at room temperature, or at 16°C in a  
425 wine cooler (Koldfront).

426

### 427 Bacterial effects on *M. brevicollis*

#### 428 ***Isolating environmental bacteria***

429 Environmental bacterial species were isolated from water samples from Woods  
430 Hole, MA, St. Petersburg, FL, and Dallas, TX. Water samples were streaked onto Sea  
431 Water Complete media or LB plates, and grown at 30° C or 37° C. After isolating  
432 individual colonies, partial 16S sequencing using 16S universal primers (27F: 5'-  
433 AGAGTTTGATCCTGGCTCAG-3', 1492R: 5'-TACGGYTACCTTGTTACGACTT-3') was  
434 used to determine the identity of the bacterial isolates.

#### 435 ***Screening for pathogenic effects***

436 *M. brevicollis* was grown for 30 h, and feeding bacteria were reduced through  
437 one round of centrifugation and resuspension in artificial seawater (ASW). Cells were  
438 counted on a hemocytometer and diluted to 5x10<sup>6</sup> cells/mL in High Nutrient Medium,  
439 and plated into 24-well plates.

440 For each bacterium, a single colony was inoculated into LB and grown shaking  
441 overnight at either 30° C (environmental isolates) or 37° C (mouse isolates). Bacterial  
442 cells were pelleted by centrifugation for 5 minutes at 4000 x g, and resuspended in  
443 artificial seawater (ASW) to an OD~1.

444 Each bacterial species was added to *M. brevicollis* culture at two concentrations  
445 (10mL/mL and 50 mL/mL) in duplicate. *M. brevicollis* was then monitored at regular  
446 intervals for changes in behavior and growth.

#### 447 **Growth curves in the presence of bacteria**

448 All bacteria were grown shaking at 30° C in Sea Water Complete media or LB (to  
449 optical density of 0.8). For each bacterial strain, CFU plating was used to estimate the  
450 number of bacterial cells/ mL under these growth conditions. To prepare bacterial  
451 conditioned media, bacterial cells were pelleted by centrifugation for 10 minutes at 4000  
452 x g, and supernatant was passed through a 0.22mm sterilizing filter.

453 *M. brevicollis* was grown for 30 h, and bacteria were washed away through two  
454 consecutive rounds of centrifugation and resuspension in artificial seawater (ASW).  
455 Cells were counted on a hemocytometer and diluted to  $1.0 \times 10^6$  cells/mL (growth curves  
456 with live bacteria) or  $1.5 \times 10^5$  cells/mL (growth curves with conditioned medium) in High  
457 Nutrient Medium. To test the effects of live bacteria,  $1.5 \times 10^6$  bacterial cells were added  
458 per 1 mL of *M. brevicollis* culture. To test the effects of bacterial conditioned media, 50  
459 ml of bacterial conditioned media was added per 1 mL of *M. brevicollis* culture. For each  
460 growth curve biological replicate, cells were plated into 24-well plates, and two wells  
461 were counted per time point as technical replicates. At least three biological replicates  
462 are represented in each graph.

#### 463 **Bacterial internalization**

464 Fluorescent *E. coli* and *P. aeruginosa* were grown shaking at 30° C in LB to an  
465 optical density of  $OD_{600}=0.8$ . Fluorescent *C. jejuni* was grown from freezer stocks in  
466 microaerobic conditions on Mueller-Hinton agar. For each bacterial strain, CFU plating  
467 was used to estimate the number of bacterial cells/ mL under these growth conditions.

468 *M. brevicollis* was grown for 30 h, and bacteria were washed away with one  
469 round of centrifugation and resuspension in artificial seawater (ASW). Cells were  
470 counted and diluted to  $1.5 \times 10^5$  cells/mL in ASW.  $7.5 \times 10^6$  bacterial cells were added to 5  
471 mL *M. brevicollis* culture in a 50mL conical, and co-incubated at room temperature with  
472 gentle mixing at regular intervals. To quantify bead internalization, *M. brevicollis* was co-  
473 incubated with bacteria for 1 hour (as described above), at which point  $\sim 1 \times 10^{10}$  beads  
474 (0.2mm diameter, resuspended in 1% BSA to prevent clumping) were added to the  
475 conical for an additional 30 minutes.

476 Prior to imaging, 200mL aliquots were transferred to 8-well glass bottom  
477 chambers (Ibidi Cat. No 80827). Live imaging was performed on a Zeiss Axio Observer  
478 widefield microscope using a 63x objective. Images were processed and analyzed using  
479 Fiji<sup>56</sup>.

## 480 ***P. aeruginosa* deletion mutants**

481 *P. aeruginosa* deletion strains were acquired from the Seattle PAO1 transposon  
482 mutant library (NIH P30 DK089507). The effects of both live bacteria and bacterial  
483 conditioned medium were tested for all acquired strains at a range of PFU/mL (live  
484 bacteria) or percent volume (conditioned medium).

485

## 486 Immune agonist dose-response curves

487 *M. brevicollis* was grown to late-log phase, and feeding bacteria were reduced  
488 through one round of centrifugation and resuspension in artificial seawater (ASW). Cells  
489 were counted on a hemocytometer and diluted to  $1.0 \times 10^6$  cells/mL (growth curves with  
490 live bacteria) in High Nutrient Medium, and aliquoted into 96-well (100 $\mu$ L/well) or 24-well  
491 (1mL/well) plates. Immune agonists were added at indicated concentrations in technical  
492 duplicate, and cells were counted again after 24 hours. % survival is a calculation of:  
493 [mean experimental (cells/mL) / mean control (cells/mL)]. Each dose-response curve is  
494 representative of at least three biological replicates.

495

## 496 RNA-seq

### 497 ***Growth of choanoflagellate cultures***

498 After thawing new cultures, growth curves were conducted to determine the  
499 seeding density and time required to harvest cells at late-log phase growth. To grow  
500 large numbers of cells for RNA-seq, cells were seeded one to two days prior to the  
501 experiment in either 3-layer flasks (Falcon; Corning, Oneonta, NY, USA; Cat. No. 14-  
502 826-95) or 75 cm<sup>2</sup> flasks (Falcon; Corning, Oneonta, NY, USA; Cat. No. 13-680-65),  
503 and grown at room temperature. Bacteria were washed away from choanoflagellate  
504 cells through two rounds of centrifugation and resuspension in artificial seawater (ASW).  
505 To count the cell density, cells were diluted 100-fold in 200  $\mu$ L of ASW, and fixed with 1  
506  $\mu$ L of 16% paraformaldehyde. Cells were counted on a hemocytometer, and the  
507 remaining cells were diluted to a final concentration of  $4 \times 10^6$  choanoflagellate cells/mL.  
508 The resuspended cells were divided into 2.5 mL aliquots and plated in 6-well plates  
509 prior to treatment. After treatment, cells were transferred to a 15 mL conical and  
510 pelleted by centrifugation at 2400 x *g* for 5 min, flash frozen with liquid nitrogen, and  
511 stored at -80°C.

### 512 ***RNA isolation***

513 Total RNA was isolated from cell pellets with the RNAqueous kit (Ambion,  
514 Thermo Fisher Scientific). Double the amount of lysis buffer was used to increase RNA  
515 yield and decrease degradation, and RNA was eluted in minimal volumes in each of the  
516 two elution steps (40  $\mu$ L and 15  $\mu$ L). RNA was precipitated in LiCl to remove  
517 contaminating genomic DNA. Total RNA concentration and quality was evaluated using  
518 the Agilent Bioanalyzer 2100 system and RNA Nano Chip kit (Cat No. 5067-1511).

### 519 ***Library preparation, sequencing, and analysis***

520 Libraries were prepared and sequenced by the UTSW Genomics Sequencing  
521 Core. RNA libraries were generated with the Illumina TruSeq® Stranded mRNA Library  
522 prep kit (Cat No. 20020594), using a starting total RNA input of 2-3 µg. To remove  
523 contaminating bacterial RNA, samples were first poly-A selected using oligo-dT  
524 attached magnetic beads. Following purification, the mRNA was fragmented at 94°C for  
525 4 minutes, and cleaved RNA fragments were synthesized into cDNA. After an end  
526 repair step, UMI adapters (synthesized by IDT) were ligated to the cDNA, and the  
527 products were twice purified using AMPure XP beads before amplification.  
528 Library quantity was measured using the Quant-iT™ PicoGreen dsDNA Assay kit by  
529 Invitrogen (Cat No. P7589) and a PerkinElmer Victor X3, 2030 Multilabel Reader.  
530 Library quality was verified on an Agilent 2100 Bioanalyzer instrument using Agilent  
531 High sensitivity DNA kit (Cat No. 5067-4626) or DNA 1000 kit (Cat No. 5067-  
532 1504). Libraries were pooled, and sequenced in different batches on either the Illumina  
533 NextSeq 550 system with SE-75 workflow, or the Illumina NovaSeq 6000 system with  
534 S4 flowcell and XP PE-100 workflow, generating 25-40 million reads per sample. Reads  
535 were checked for quality using fastqc (v0.11.2) and fastq\_screen (v0.4.4), and trimmed  
536 using fastq-mcf (ea-utils, v1.1.2-806). Trimmed fastq files were mapped to the *Monosiga*  
537 *brevicollis* reference genome (NCBI:txid81824) using TopHat<sup>57</sup> (v2.0.12). Duplicates  
538 were marked using picard-tools (v2.10.10). Read counts were generated using  
539 featureCounts<sup>58</sup>, and differential expression analysis was performed using edgeR<sup>59</sup>.  
540 Statistical cutoffs of  $FDR \leq 10^{-4}$  were used to identify significant differentially expressed  
541 genes. GO enrichment analysis of differentially expressed genes was performed using  
542 DAVID (<https://david.ncifcrf.gov/>).

543

#### 544 Immunoblotting

545 *M. brevicollis* was harvested by centrifugation at 5,000 x g for 5 min at 4°C, and  
546 resuspended in 100 µL lysis buffer (50mM Tris, pH 7.4, 150 mM NaCl, 1 mM EDTA, 1  
547 mM ethyleneglycoltetraacetic acid [EGTA], 0.5% sodium deoxycholate, 1% NP-40)  
548 containing protease inhibitor cocktail (Roche) for 10 min at 4°C. The crude lysate was  
549 clarified by centrifugation at 10,000 x g for 10 min at 4°C, and denatured in Laemmli  
550 buffer before SDS-PAGE. Proteins were transferred to an Immobilon-P PVDF  
551 membrane (Millipore), and blocked for two hours in PBST (1x PBS containing 5% nonfat  
552 dry milk and 0.05% Tween-20). Membranes were incubated with primary antibodies  
553 diluted in PBST overnight at 4°C and washed extensively in PBST. Membranes were  
554 incubated with secondary antibodies for 1 hour at room temperature, washed  
555 extensively in PBST, and developed using Immobilon Western Chemiluminescent HRP  
556 Substrate (Millipore Sigma).

#### 557 **STING antibody production**

558 The anti-mbreSTING antibody was generated by Pacific Immunology. Rabbits  
559 were immunized with a KLH-conjugated peptide corresponding to residues 320-338 of

560 *M. brevicollis* protein EDQ90889.1 (Cys-KNRSEVLKMKMRAEDQYAMP), and serum was  
561 affinity purified against the peptide to reduce cross-reactivity and validated using  
562 immunoblotting.

563

#### 564 Immunofluorescence Staining and Imaging

565 Depending on the cell density of the starting culture, between 0.2-1 mL of cells  
566 were concentrated by centrifugation for 5 min at 2500 × *g*. The cells were resuspended  
567 in 200 µl of artificial seawater and applied to poly-L-lysine-coated coverslips (Corning  
568 Life Sciences; Cat. No.354085) placed at the bottom of each well of a 24-well cell  
569 culture dish. After the cells were allowed to settle on the coverslip for 30 min, 150 µl of  
570 the cell solution was gently removed from the side of the dish. All of the subsequent  
571 washes and incubations during the staining procedure were performed by adding and  
572 removing 200 µl of the indicated buffer.

573 Cells were fixed in two stages. First, 200 µl cold 6% acetone diluted in 4X PBS  
574 was added for 5 min at room temperature. Next, 200 µl cold 8% paraformaldehyde  
575 diluted in 4X PBS was added (yielding a final concentration of 4% paraformaldehyde),  
576 and the fixative mixture was incubated for 15 min at room temperature. After fixation,  
577 the coverslip was gently washed three times with 200 µl 4X PBS.

578 Cells were permeabilized by incubating in permeabilization buffer (4X PBS; 3%  
579 [wt/vol] bovine serum albumin (BSA)-fraction V; 0.2% [vol/vol] Triton X-100) for 30 min.  
580 After removing permeabilization buffer, the coverslip was incubated in primary antibody  
581 for 1 hour at room temperature, and then washed three times in 4X PBS. The coverslip  
582 was then incubated with secondary antibody for 1 hour at room temperature, and then  
583 washed twice in 4X PBS. The coverslip was next incubated in 4 U/ml Phalloidin  
584 (Thermo Fisher Scientific) for 30 min at room temperature, washed once in 4X PBS.  
585 Lastly, the coverslip was incubated in 10 µg/ml Hoechst 33342 (Thermo Fisher  
586 Scientific) for 5 min at room temperature, and then washed once with 4X PBS.

587 To prepare a slide for mounting, 10 µl of Pro-Long Gold (Thermo Fisher  
588 Scientific) was added to a slide. The coverslip was gently removed from the well with  
589 forceps, excess buffer was blotted from the side with a piece of filter paper, and the  
590 coverslip was gently placed on the drop of Pro-Long diamond. The mounting media  
591 cured overnight before visualization.

592 Images were acquired on either: (1) a Zeiss LSM 880 Airyscan confocal microscope  
593 with a 63x objective by frame scanning in the superresolution mode (images processed  
594 using the automated Airyscan algorithm (Zeiss)), or (2) a Nikon CSU-W1 SoRa spinning  
595 disk confocal microscope with a 60x objective in SR mode (images processed using  
596 Imaris).

597

#### 598 Live-Cell Imaging

599 Cells transfected with fluorescent reporter plasmid were prepared for microscopy  
600 by transferring 200  $\mu$ l of cells to a glass-bottom dish or glass-bottom 8-well chamber  
601 (Ibidi). Confocal microscopy was performed on a Zeiss Axio Observer LSM 880 with an  
602 Fast Airyscan detector and a 63x/NA1.40 Plan-Apochromatic oil immersion objective  
603 (Carl Zeiss AG, Oberkochen, Germany). Confocal stacks were acquired by frame  
604 scanning in superresolution mode, and images were processed using the automated  
605 Airyscan algorithm (Zeiss).

606

#### 607 Transfection of *M. brevicollis*

608 **Cell Culture.** One day prior to transfection, 60 ml of High Nutrient Medium was  
609 inoculated with *M. brevicollis* to a final concentration of 10000 cells/ml. The culture was  
610 split in two, and grown in two 75 cm<sup>2</sup> flasks at room temperature, approximately 22°C  
611 (Falcon; Corning, Oneonta, NY, USA; Cat. No. 13-680-65).

612 **Cell Washing.** After 24 hours of growth, bacteria were washed away from *M.*  
613 *brevicollis* cells through three consecutive rounds of centrifugation and resuspension in  
614 artificial seawater (ASW). The culture flasks were combined and vigorously shaken for  
615 30 s, and then transferred to 50-ml conical tubes and spun for 5 min at 2000  $\times$  *g* and  
616 22°C. The supernatant was removed with a serological pipette, and residual media were  
617 removed with a fine-tip transfer pipette. The cell pellets were resuspended in a single  
618 conical tube in a total volume of 50 ml of ASW, vigorously shaken for 30 s, and then  
619 centrifuged for 5 min at 2050  $\times$  *g*. The supernatant was removed as before. In a final  
620 washing step, the cell pellet was resuspended in 50 mL ASW, shaken vigorously, and  
621 centrifuged for 5 min at 2100  $\times$  *g*. After the supernatant was removed, the cells were  
622 resuspended in a total volume of 400  $\mu$ l of ASW. To count the cell density, cells were  
623 diluted 100-fold in 200  $\mu$ l of ASW, and fixed with 1  $\mu$ l of 16% paraformaldehyde. Cells  
624 were counted on a hemocytometer, and the remaining cells were diluted to a final  
625 concentration of 5  $\times$  10<sup>7</sup> choanoflagellate cells/ml. The resuspended cells were divided  
626 into 100- $\mu$ l aliquots with 5  $\times$  10<sup>6</sup> cells per aliquot to immediately prime cells in the next  
627 step.

628 **Cell Priming.** Each aliquot of *M. brevicollis* cells was incubated in priming buffer (40  
629 mM HEPES-KOH, pH 7.5; 55 mM lithium citrate; 50 mM L-cysteine; 10% [wt/vol] PEG  
630 8000; and 2  $\mu$ M papain) to remove the extracellular material coating the cell. The 100- $\mu$ l  
631 aliquots, which contained 5  $\times$  10<sup>6</sup> cells, were centrifuged for 5 min at 1700  $\times$  *g*. The  
632 supernatant was removed, and cells were resuspended in 100  $\mu$ l of priming buffer and  
633 then incubated for 35 min at room temperature. Priming was quenched by adding 4  $\mu$ l of  
634 50-mg/ml bovine serum albumin-fraction V (Thermo Fisher Scientific, Waltham, MA;  
635 Cat. No. BP1600-100) and then centrifuged for 5 min at 1250  $\times$  *g* and 22°C with the  
636 centrifuge brake set to a “soft” setting. The supernatant was removed with a fine-tip  
637 micropipette, and the cells were resuspended in 25  $\mu$ l of SG Buffer (Lonza).



638 **Nucleofection.** Each transfection reaction was prepared by adding 2  $\mu$ l of “primed”  
639 cells resuspended in SG buffer (Lonza) to a mixture of: 16  $\mu$ l of SG buffer, 2  $\mu$ l of 20  
640  $\mu$ g/ $\mu$ l pUC19, 1  $\mu$ l of 250 mM ATP (pH 7.5), 1  $\mu$ l of 100 mg/ml sodium heparin, and  $\leq$ 7  $\mu$ l  
641 of reporter DNA (volume is dependent on the number of constructs transfected). Each  
642 transfection reaction was transferred to one well in 16-well nucleofection strip (Lonza;  
643 Cat. No. V4XC-2032). The nucleofection strip was placed in the X-unit (Lonza; Cat. No.  
644 AAF-1002F) connected to a Nucleofector 4D core unit (Lonza; Cat. No. AAF-1002B),  
645 and the EO100 pulse was applied to each well.

646 **Recovery.** 100  $\mu$ l of cold recovery buffer (10 mM HEPES-KOH, pH 7.5; 0.9 M  
647 sorbitol; 8% [wt/vol] PEG 8000) was added to the cells immediately after pulsation. After  
648 5 minutes, the whole volume of the transfection reaction plus the recovery buffer was  
649 transferred to 2 ml of Low Nutrient Medium in a 12-well plate. The cells were grown for  
650 24–48 hours before being assayed for luminescence or fluorescence.

651 **Puromycin Selection.** To generate stably transfected *M. brevicollis* cell lines,  
652 puromycin was added to cells 24 hours after transfection at a final concentration of 300  
653  $\mu$ g/mL. Cells were monitored over the course of 7-21 days, and fresh High Nutrient  
654 Media + 300  $\mu$ g/mL puromycin was added to the cells as needed.

655

#### 656 Genome editing

657 For a more detailed description of gRNA and repair oligonucleotide design, refer to  
658 Booth et al. 2018<sup>48</sup>.

659 **Design and preparation of gRNAs** First, crRNAs were designed by using the  
660 extended recognition motif 5'-HNNGRSGGH-3' (in which the PAM is underlined, N  
661 stands for any base, R stands for purine, S stands for G or C, and H stands for any  
662 base except G) to search for targets in cDNA sequences<sup>60</sup>. Next, we confirmed that the  
663 RNA sequence did not span exon-exon junctions by aligning the sequence to genomic  
664 DNA.

665 Functional gRNAs were prepared by annealing synthetic crRNA with a synthetic  
666 tracrRNA<sup>50</sup>. To prepare a functional gRNA complex from synthetic RNAs, crRNA and  
667 tracrRNA (Integrated DNA Technologies [IDT], Coralville, IA, USA) were resuspended  
668 to a final concentration of 200  $\mu$ M in duplex buffer (30 mM HEPES-KOH, pH 7.5; 100  
669 mM potassium acetate; IDT, Cat. No. 11-0103-01). Equal volumes of crRNA and  
670 tracrRNA stocks were mixed together, incubated at 95°C for 5 min in an aluminum  
671 block, and then the entire aluminum block was placed at room temp to slowly cool the  
672 RNA to 25°C. The RNA was stored at -20°C

673 **Design and preparation of repair oligonucleotides** Repair oligonucleotides for  
674 generating knockouts were designed by copying the sequence 50 bases upstream and  
675 downstream of the SpCas9 cleavage site. A knockout sequence  
676 (5' TTTATTTAATTAATAAAA-3') was inserted at the cleavage site<sup>50</sup>.

677 Dried oligonucleotides (IDT) were resuspended to a concentration of 250  $\mu$ M in a  
678 buffer of 10 mM HEPES-KOH, pH 7.5, incubated at 55°C for 1 hour, and mixed well by  
679 pipetting up and down. The oligonucleotides were stored at -20°C.

#### 680 **Delivery of gene editing cargoes with nucleofection**

681 The method for delivering SpCas9 RNPs and DNA repair templates into *M.*  
682 *brevicollis* is as follows:

683 **Cell Culture.** One day prior to transfection, 60 ml of High Nutrient Medium was  
684 inoculated to a final concentration of *M. brevicollis* at 10000 cells/ml. The culture was  
685 split in two, and grown in two 75 cm<sup>2</sup> flasks at room temperature, approximately 22°C  
686 (Falcon; Corning, Oneonta, NY, USA; Cat. No. 13-680-65).

687 **Assembly of Cas9/gRNA RNP.** Before starting transfections, the SpCas9 RNP was  
688 assembled. For one reaction, 2  $\mu$ l of 20  $\mu$ M SpCas9 (NEB, Cat. No. M0646M) was  
689 placed in the bottom of a 0.25 ml PCR tube, and then 2  $\mu$ l of 100  $\mu$ M gRNA was slowly  
690 pipetted up and down with SpCas9 to gently mix the solutions. The mixed solution was  
691 incubated at room temperature for 1 hour, and then placed on ice.

692 **Thaw DNA oligonucleotides.** Before using oligonucleotides in nucleofections, the  
693 oligonucleotides were incubated at 55°C for 1 hour.

694 **Cell Washing.** After 24 hours of growth, bacteria were washed away from *M.*  
695 *brevicollis* cells through three consecutive rounds of centrifugation and resuspension in  
696 artificial seawater (ASW). The culture flasks were combined and vigorously shaken for  
697 30 s, and then transferred to 50-ml conical tubes and spun for 5 min at 2000  $\times$  *g* and  
698 22°C. The supernatant was removed with a serological pipette, and residual media were  
699 removed with a fine-tip transfer pipette. The cell pellets were resuspended in a single  
700 conical tube in a total volume of 50 ml of ASW, vigorously shaken for 30 s, and then  
701 centrifuged for 5 min at 2050  $\times$  *g*. The supernatant was removed as before. In a final  
702 washing step, the cell pellet was resuspended in 50 mL ASW, shaken vigorously, and  
703 centrifuged for 5 min at 2100  $\times$  *g*. After the supernatant was removed, the cells were  
704 resuspended in a total volume of 400  $\mu$ l of ASW. To count the cell density, cells were  
705 diluted 100-fold in 200  $\mu$ l of ASW, and fixed with 1  $\mu$ l of 16% paraformaldehyde. Cells  
706 were counted on a hemocytometer, and the remaining cells were diluted to a final  
707 concentration of 5  $\times$  10<sup>7</sup> choanoflagellate cells/ml. The resuspended cells were divided  
708 into 100- $\mu$ l aliquots with 5  $\times$  10<sup>6</sup> cells per aliquot to immediately prime cells in the next  
709 step.

710 **Cell Priming.** Each aliquot of *M. brevicollis* cells was incubated in priming buffer (40  
711 mM HEPES-KOH, pH 7.5; 50 mM lithium citrate; 50 mM L-cysteine; 15% [wt/vol] PEG  
712 8000; and 2  $\mu$ M papain) to remove the extracellular material coating the cell. The 100- $\mu$ l

713 aliquots, which contained  $5 \times 10^6$  cells, were centrifuged for 5 min at  $1700 \times g$  and at  
714 room temperature. The supernatant was removed, and cells were resuspended in 100  
715  $\mu$ l of priming buffer and then incubated for 35 min. Priming was quenched by adding 10  
716  $\mu$ l of 50-mg/ml bovine serum albumin-fraction V (Thermo Fisher Scientific, Waltham,  
717 MA; Cat. No. BP1600-100). Cells were then centrifuged for 5 min at  $1250 \times g$  and  $22^\circ\text{C}$   
718 with the centrifuge brake set to a “soft” setting. The supernatant was removed with a  
719 fine-tip micropipette, and the cells were resuspended in 25  $\mu$ l of SG Buffer (Lonza).

720 **Nucleofection.** Each nucleofection reaction was prepared by adding 16  $\mu$ l of cold  
721 SG Buffer to 4  $\mu$ l of the *SpCas9* RNP that was assembled as described above. For  
722 reactions that used two different guide RNAs, each gRNA was assembled with *SpCas9*  
723 separately and 4  $\mu$ l of each RNP solution were combined at this step. 2  $\mu$ l of the repair  
724 oligonucleotide template was added to the *SpCas9* RNP diluted in SG buffer. Finally, 2  
725  $\mu$ l of primed cells were added to the solution with Cas9 RNP and the repair template.  
726 The nucleofection reaction was placed in one well of a 16-well nucleofection strip  
727 (Lonza; Cat. No. V4XC-2032). The nucleofection strip was placed in the X-unit (Lonza;  
728 Cat. No. AAF-1002F) connected to a Nucleofector 4D core unit (Lonza; Cat. No. AAF-  
729 1002B), and the EO100 pulse was applied to each well.

730 **Recovery.** 100  $\mu$ l of cold recovery buffer (10 mM HEPES-KOH, pH 7.5; 0.9 M  
731 sorbitol; 8% [wt/vol] PEG 8000) was added to the cells immediately after pulsation. After  
732 5 minutes, the whole volume of the transfection reaction plus the recovery buffer was  
733 transferred to 1 ml of High Nutrient Medium in a 12-well plate.

734 **Cycloheximide Selection in *M. brevicollis*.** One day after transfection, 10  $\mu$ l of 10  
735  $\mu$ g/ml cycloheximide was added per 1 mL culture of transfected cells. The cells were  
736 incubated with cycloheximide for 5 days prior to clonal isolation and genotyping.

737 **Genotyping.** Cells were harvested for genotyping by spinning 0.5ml of cells at  
738  $4000g$  and  $22^\circ\text{C}$  for 5 min. The supernatant was removed and DNA was isolated either  
739 by Base-Tris extraction [in which the cell pellet was resuspended in 20 $\mu$ L base solution  
740 (25mM NaOH, 2mM EDTA), boiled at  $100^\circ\text{C}$  for 20 min, cooled at  $4^\circ\text{C}$  for 5 min, and  
741 neutralized with 20 $\mu$ L Tris solution (40mM Tris-HCl, pH 7.5)], or by DNAzol Direct [in  
742 which the cell pellet was resuspended in 50 $\mu$ L and incubated at room temperature for  
743 30 min (Molecular Research Center, Inc. [MRC, Inc.], Cincinnati, OH; Cat. No. DN131)].  
744 3  $\mu$ l of the DNA solution was added to a 25  $\mu$ l PCR reaction (DreamTaq Green PCR  
745 Master Mix, Thermo Fisher Scientific Cat No K1082) and amplified with 34 rounds of  
746 thermal cycling.

747

#### 748 Data Availability

749 Raw sequencing reads and normalized gene counts have been deposited at the NCBI  
750 GEO under accession GSE174340.

751

752

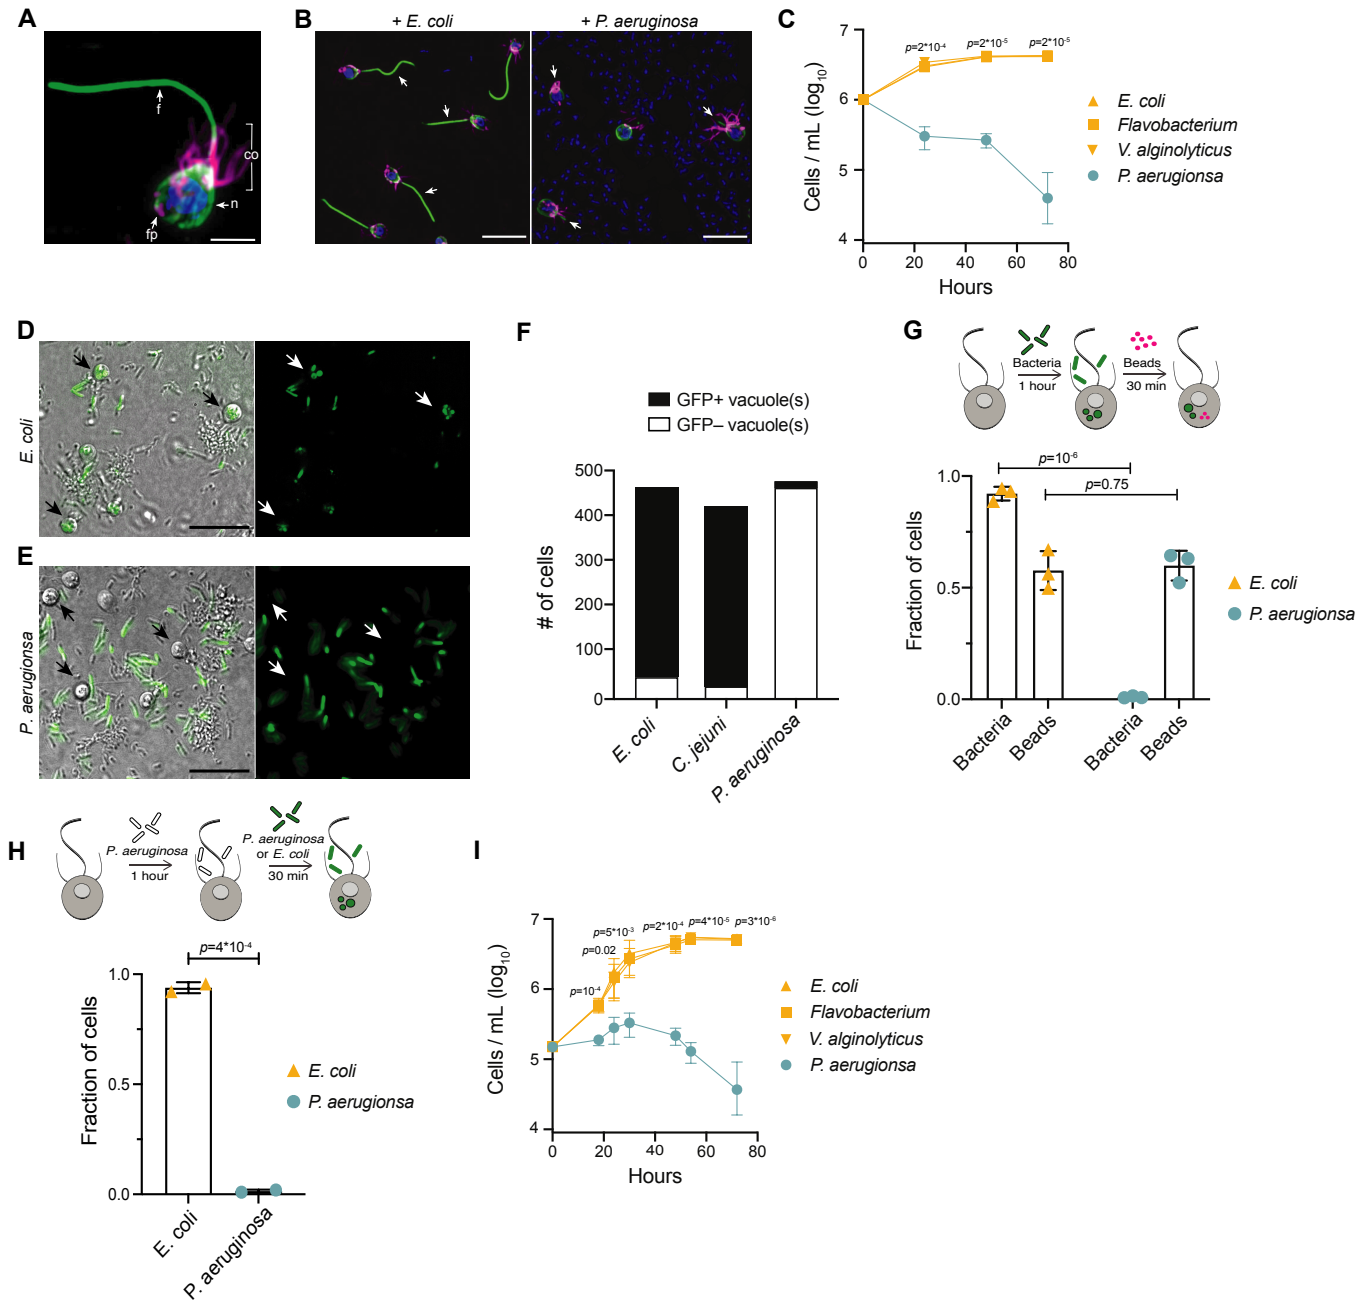

### Figure 1. *P. aeruginosa* has pathogenic effects on *M. brevicollis*

**(A)** Immunofluorescence illuminates the diagnostic cellular architecture of *M. brevicollis*, including an apical flagellum (f) made of microtubules, surrounded by an actin-filled microvilli feeding collar (co). Staining for tubulin (green) also highlights cortical microtubules that run along the periphery of the cell body, and staining for F-actin (magenta) highlights basal filopodia (fp). DNA staining (blue) highlights the nucleus (n). **(B)** *M. brevicollis* exhibits truncated flagella after exposure to *P. aeruginosa*. *M.*

*brevicollis* were exposed to *E. coli* or *P. aeruginosa* for 24 hours, and then fixed and immunostained. Arrows point to flagella. Green: anti-tubulin antibody (flagella and cell body), magenta: phalloidin (collar), blue: Hoechst (bacterial and choanoflagellate nuclei). Scale bars represent 10 $\mu$ m. **(C)** Exposure to *P. aeruginosa*, but not other Gammaproteobacteria, results in *M. brevicollis* cell death. Bacteria were added to *M. brevicollis* culture at an MOI of 1.5 (at Hours=0), and *M. brevicollis* cell density was quantified at indicated time points. Data represent mean  $\pm$  SD for three biological replicates. Statistical analysis (multiple unpaired t-tests) was performed in GraphPad software; *p*-values shown are from comparisons between *Flavobacterium* and *P. aeruginosa*. **(D-F)** *M. brevicollis* does not ingest *P. aeruginosa* bacteria. **(D,E)** *M. brevicollis* were fed either fluorescent *E. coli* (D) or *P. aeruginosa* (E) for one hour, and then visualized by DIC (D,E, left) and green fluorescence (D, E, right). Fluorescent food vacuoles were observed in choanoflagellates fed *E. coli*, but not *P. aeruginosa*. **(F)** Cells were fed fluorescent bacteria for one hour, and then imaged by DIC and green fluorescence. Cells with  $\geq 1$  GFP+ food vacuole were scored as GFP+, and cells without any GFP+ food vacuoles were scored as GFP-. Data represent three biological replicates. **(G,H)** *M. brevicollis* selectively avoids eating *P. aeruginosa*. **(G)** Internalization of 0.2 $\mu$ m fluorescent beads was used to quantify phagocytic activity after exposure to *E. coli* or *P. aeruginosa* bacteria. Although cells did not phagocytose *P. aeruginosa*, cells exposed to *E. coli* and *P. aeruginosa* had similar phagocytic uptake of beads. Data represent n=600 cells from three biological replicates. Statistical analyses (multiple unpaired t-tests) were performed in GraphPad software. **(H)** Exposure to *P. aeruginosa* does not inhibit phagocytic uptake of *E. coli*. Internalization of fluorescent *E. coli* or *P. aeruginosa* bacteria was quantified after exposure to unlabeled *P. aeruginosa* (PAO1 strain). Data represent n=200 cells from two biological replicates. Statistical analysis (unpaired t-test) was performed in GraphPad software. **(I)** Secreted *P. aeruginosa* molecules are sufficient to induce *M. brevicollis* cell death. 5% (vol/vol) bacterial conditioned medium was added to *M. brevicollis* culture (at Hours=0), and *M. brevicollis* cell density was quantified at indicated time points. Data represent mean  $\pm$  SD for three biological replicates. Statistical analysis (multiple unpaired t-tests) was performed in GraphPad software, and *p*-values shown are from comparisons between *Flavobacterium* and *P. aeruginosa*.

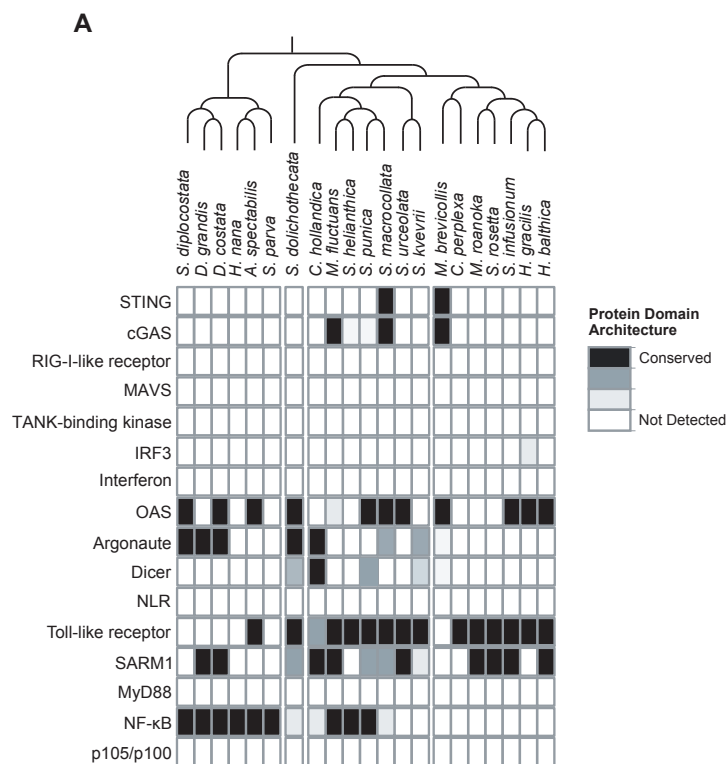

**Supplemental Figure 1. Presence of animal innate immune genes in choanoflagellates (A)** The transcriptomes of 21 choanoflagellate species<sup>3</sup> were searched for genes that play key roles in animal innate immune responses. Evidence for gene presence was based on sequence homology in a BLAST-based approach and conserved domain architectures, as described in Richter et al., 2018.

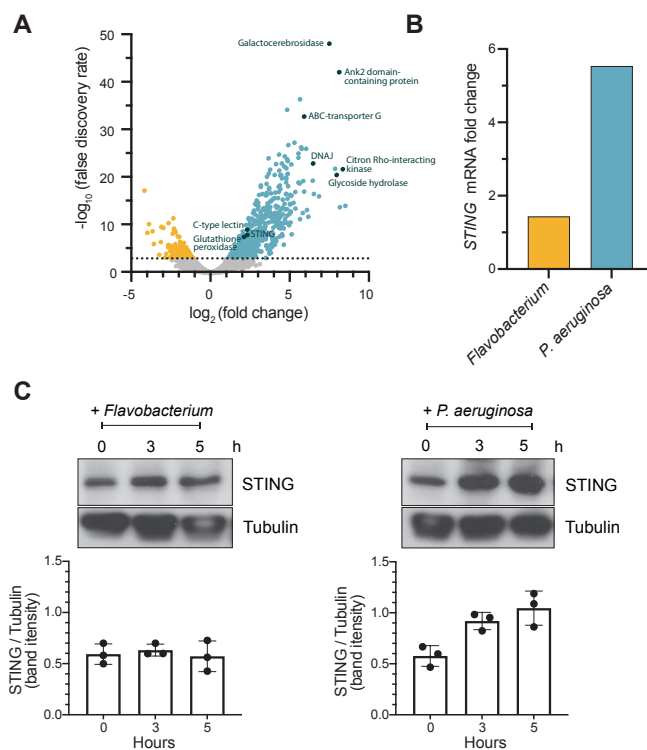

**Figure 2. STING is upregulated in *M. brevicollis* after exposure to *P. aeruginosa*** (A,B) *STING* transcript levels increase in response to *P. aeruginosa*. (A) Volcano plot displaying genes differentially expressed between *M. brevicollis* exposed to *P. aeruginosa* PAO1 and *Flavobacterium* (control) conditioned medium for three hours. Differentially expressed genes are depicted by blue (674 upregulated genes) and yellow (232 downregulated genes) dots (fold change  $\geq 2$ ; FDR  $\leq 1e^{-4}$ ). Select genes that are upregulated or may function in innate immunity are labeled. RNA-seq libraries were prepared from four biological replicates. (B) After a three-hour treatment, *STING* mRNA levels (determined by RNA-seq) increase 1.42 fold in cells exposed to *Flavobacterium* conditioned medium and 5.54 fold in cells exposed to *P. aeruginosa* conditioned medium, compared to untreated controls. (C) *STING* protein levels increase after exposure to *P. aeruginosa*. *STING* levels were examined by immunoblotting at indicated timepoints after exposure to *Flavobacterium* or *P. aeruginosa* conditioned medium (5% vol/vol). Tubulin is shown as loading control, and intensity of *STING* protein bands were quantified relative to tubulin.





*P. aeruginosa*. Due to lack of annotation, >40% of the differentially expressed genes were not included in the enrichment analysis. **(B)** To validate the *M. brevicollis* STING antibody, cell lysates from *M. brevicollis* were immunoblotted alongside cell lysates from *S. rosetta*, a closely-related choanoflagellate species that does not have a STING homolog. A band at 36kD, the predicted size of *M. brevicollis* STING, is detectable in *M. brevicollis* lysate but not *S. rosetta* lysate. Arrow indicates STING band. Non-specific bands are likely due to co-cultured feeding bacteria. Tubulin is shown as loading control. **(C)** Protein sequence alignment (generated by Clustal Omega multiple sequence alignment) of *M. brevicollis* and animal STING proteins, colored by similarity. *M. brevicollis* STING and human STING are 19.1% identical and 36.6% similar at the amino acid level.

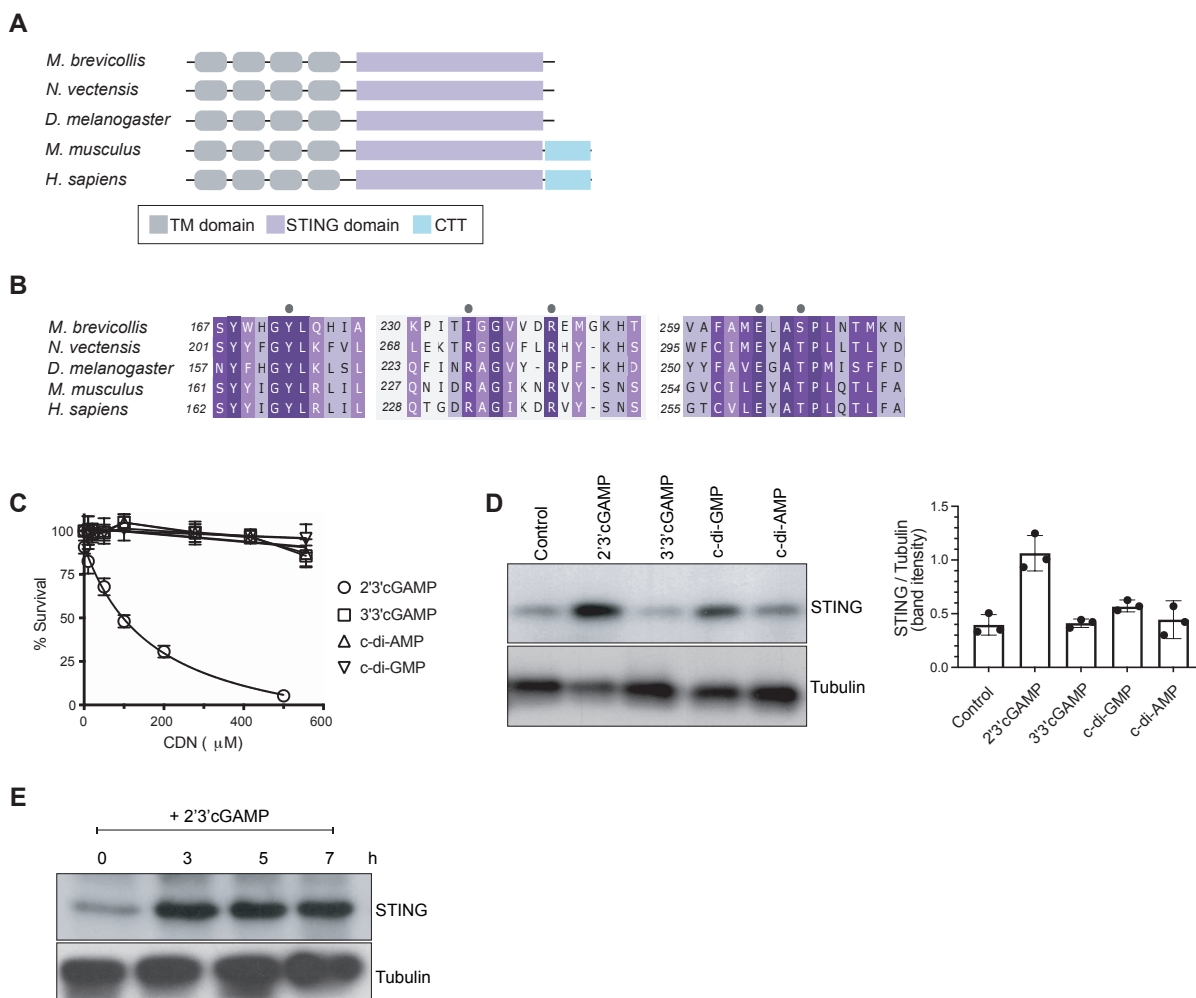

### Figure 3. 2'3' cGAMP, but not bacterially-produced cyclic dinucleotides, induces elevated levels of STING

**(A)** Schematic of choanoflagellate (*M. brevicollis*), sea anemone (*N. vectensis*), insect (*D. melanogaster*) and mammalian (*M. musculus* and *H. sapiens*) STING proteins. Transmembrane (TM) domains are depicted in gray, STING cyclic dinucleotide binding domain (CDN) in purple, and C-terminal tail domain (CTT) in blue. **(B)** Partial protein sequence alignment (generated by Clustal Omega multiple sequence alignment) of *M. brevicollis* and animal STING proteins, colored by similarity. *M. brevicollis* STING and human STING are 19.1% identical and 36.6% similar at the amino acid level. Key cyclic dinucleotide-interacting residues from human STING structure are indicated by circles. **(C)** Dose-response curves of *M. brevicollis* exposed to cyclic dinucleotides for 24 hours reveal that treatment with 2'3'cGAMP, but not 3'3' cGAMP, c-di-AMP, or c-di-GMP, leads to *M. brevicollis* cell death in a dose-dependent manner. Data represent mean +/- SD for at least three biological replicates. **(D)** STING protein levels increase after exposure to 2'3'cGAMP, but not bacterially-produced cyclic dinucleotides. *M. brevicollis*

STING levels were examined by immunoblotting 5 hours after exposure to 2'3'cGAMP (100  $\mu$ M), 3'3'cGAMP (200  $\mu$ M), c-di-GMP (200  $\mu$ M), or c-di-AMP (200  $\mu$ M). Tubulin is shown as loading control, and intensity of STING protein bands were quantified relative to tubulin. Shown is a representative blot from three biological replicates. **(E)** STING protein levels increase and remain elevated after exposure to 100 $\mu$ M 2'3'cGAMP. Tubulin is shown as loading control, and data are representative of three biological replicates.

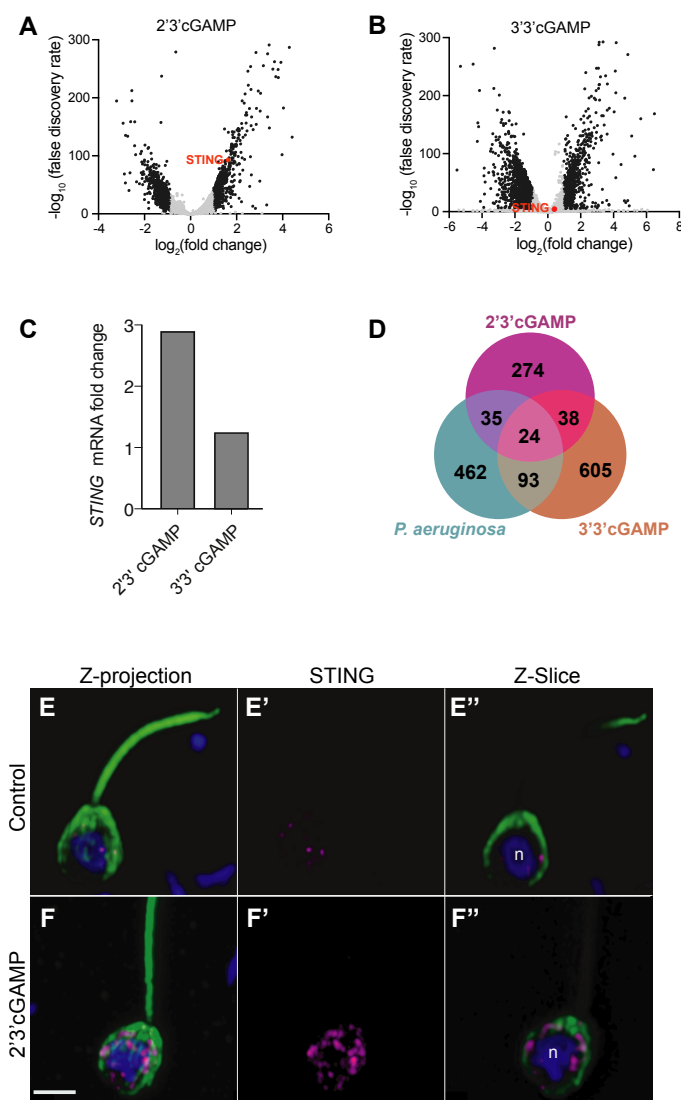

### Supplemental Figure 3. *M. brevicollis* has distinct responses to 2'3' cGAMP and 3'3' cGAMP

(A,B) Volcano plots displaying RNA-seq differential expression analysis of *M. brevicollis* treated with (A) 100  $\mu$ M 2'3'cGAMP or (B) 200  $\mu$ M 3'3'cGAMP for 3 hours, relative to an untreated control. Genes with a fold change  $\geq 2$  and false discovery rate  $\leq 10e^{-4}$  are depicted by black dots. STING is highlighted in red. RNA-seq libraries were prepared from three (2'3' cGAMP) or two (3'3' cGAMP) biological replicates. (C) *STING* mRNA levels increase in response to 2'3'cGAMP. Shown are RNA-seq fold changes of *M. brevicollis* *STING* mRNA after exposure to 2'3'cGAMP (100  $\mu$ M) or 3'3'cGAMP (200  $\mu$ M) for three hours, compared to vehicle control. (D) Venn diagram comparing the

overlap of genes identified as differentially expressed after treatment with 2'3'cGAMP, 3'3'cGAMP, and *P. aeruginosa* (DEG cutoff: fold change  $\geq 3$ , false discovery rate  $\leq 10e^{-4}$ ). **(E,F)** Representative immunostained *M. brevicollis* demonstrating 2'3'cGAMP stimulates the formation of STING puncta at perinuclear regions. *M. brevicollis* was left untreated (E), or exposed to 100  $\mu\text{M}$  2'3'cGAMP (F) for 5 hours. Cells were fixed and STING levels and localization were probed using an anti-STING antibody. **(E',F')** Exposure to 2'3'cGAMP results in increased numbers of STING puncta compared to untreated controls. **(E'',F'')** Z-slice images of the plane containing the nucleus 'n' show that STING puncta localize to perinuclear regions. Green: anti-tubulin antibody (flagella and cell body), magenta: anti-STING antibody, blue: Hoechst. Scale bar represents 2  $\mu\text{m}$ .

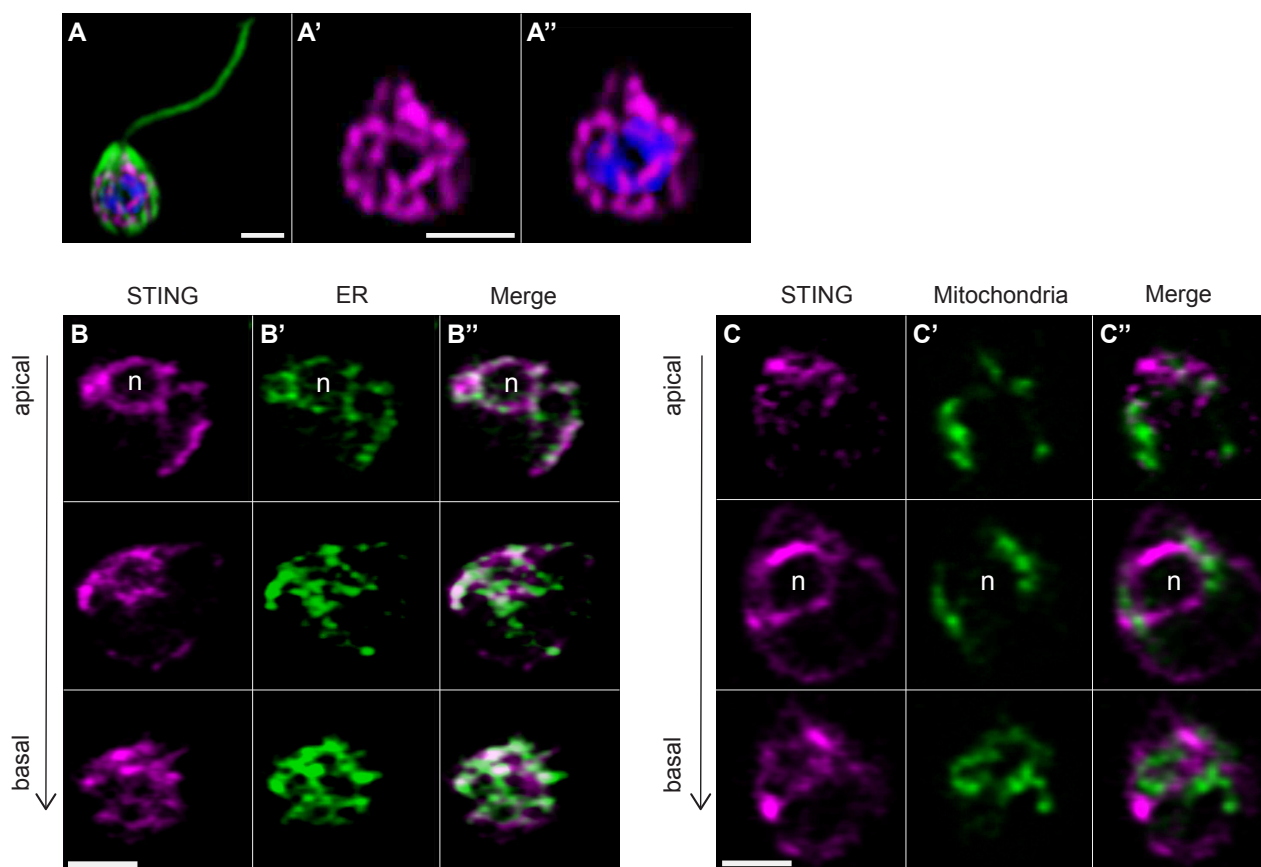

#### Figure 4. Transfection reveals STING localization to perinuclear and endoplasmic reticulum regions

**(A)** STING-mTFP localizes to tubule-like structures around the nucleus in cells stably expressing STING-mTFP. Green: anti-tubulin antibody (flagella and cell body), magenta: anti-STING antibody, blue: Hoechst. Scale bar represents 2  $\mu\text{m}$ . **(B,C)** Fluorescent markers and live cell imaging reveal that STING is localized to the endoplasmic reticulum (ER). Cells were co-transfected with STING-mTFP and an mCherry fusion protein that localizes either to the endoplasmic reticulum (B; mCherry-HDEL) or mitochondria (C; Cox4-mCherry)<sup>4</sup>. Cells were recovered in the presence of *Flavobacterium* feeding bacteria for 28 hours after co-transfection, and then live cells were visualized with super-resolution microscopy. Each panel shows Z-slice images of a single representative cell. In confocal Z-slice images, cells are oriented with the apical flagella pointing up, and the nucleus is marked by 'n' when clearly included in the plane of focus. STING colocalized with the ER marker (B''), but not the mitochondrial marker (C''). Scale bar represents 2  $\mu\text{m}$ .

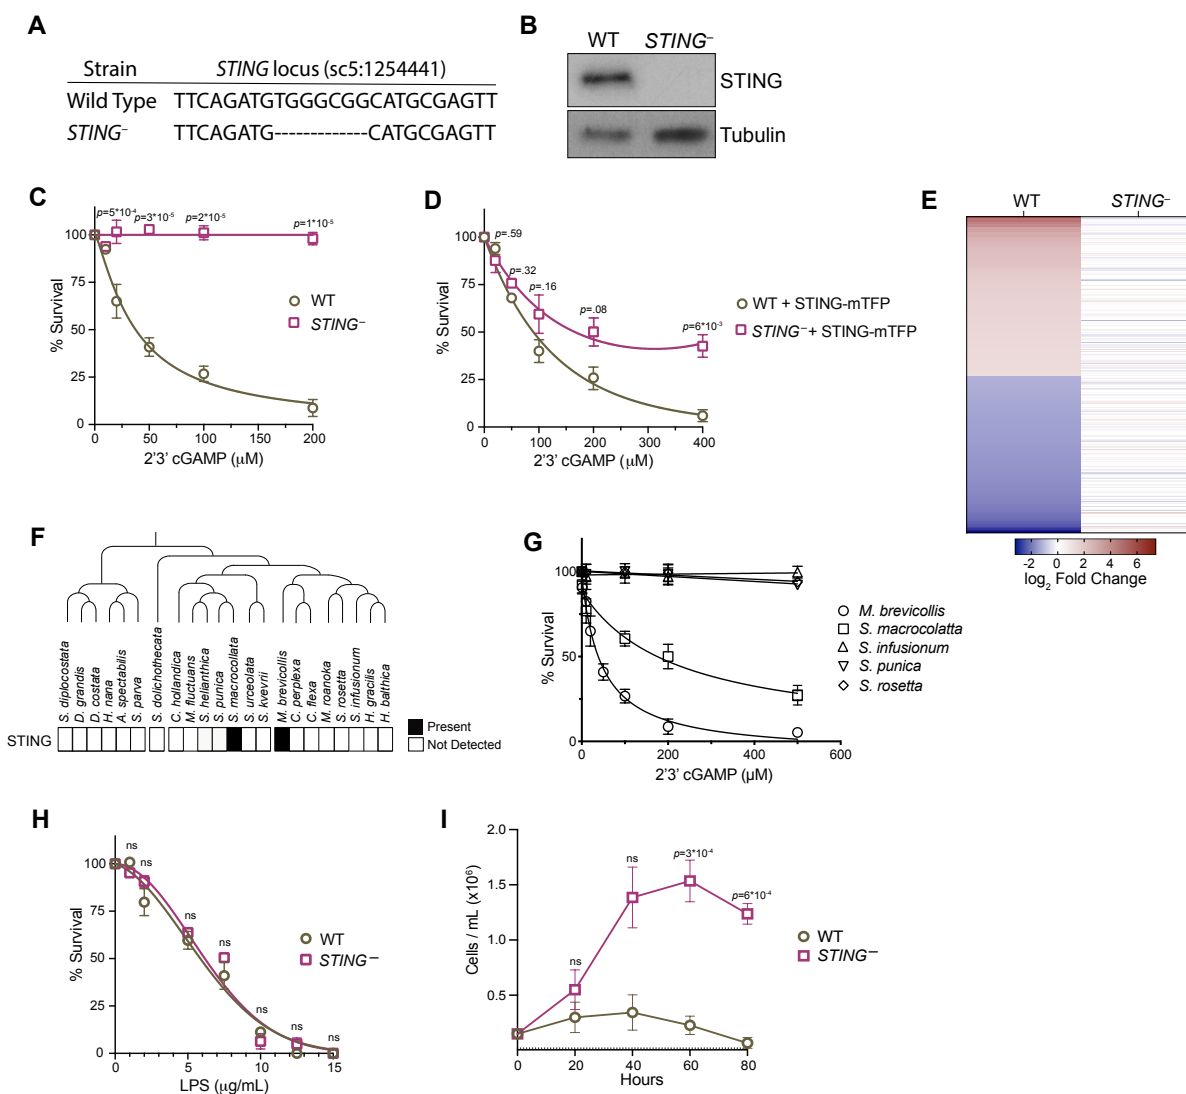

## Figure 5. *STING* mediates responses to 2'3'cGAMP

(A) The genotypes of wild type and genome-edited *STING*<sup>-</sup> strains at the *STING* locus. (B) *STING* protein is not detectable by immunoblot in *STING*<sup>-</sup> cells. Shown is a representative blot from three biological replicates. (C,D) *STING* is necessary for 2'3'cGAMP-induced cell death. (C) Wild type and *STING*<sup>-</sup> strains were treated with increasing concentrations of 2'3'cGAMP, and survival was quantified after 24 hours. In contrast to wild type cells, 2'3'cGAMP does not induce cell death in *STING*<sup>-</sup> cells. Data represent mean +/- SD for four biological replicates. (D) Wild type and *STING*<sup>-</sup> cells were transfected with *STING*-mTFP, and treated with puromycin to generate stable clonal strains. Stable expression of *STING*-mTFP in *STING*<sup>-</sup> cells partially rescued the phenotype of 2'3'cGAMP-induced cell death. Data represent mean +/- SD for three biological replicates. Statistical analysis (multiple unpaired t-tests) was performed in GraphPad software. (E) Wild type and *STING*<sup>-</sup> strains have distinct transcriptional responses to 2'3' cGAMP. Differential expression analysis was performed on wild type

and *STING*<sup>-</sup> cells treated with 100 $\mu$ M 2'3'cGAMP or a vehicle control for three hours. A heatmap comparing the log<sub>2</sub> fold change of genes identified as differentially expressed (FC  $\geq$ 2; FDR $\leq$ 10<sup>-4</sup>) in wild type cells after 2'3' cGAMP treatment, to their log<sub>2</sub> fold change in *STING*<sup>-</sup> cells after 2'3' cGAMP treatment. RNA-seq libraries were prepared from two biological replicates. **(F)** Presence of STING in the transcriptomes of diverse choanoflagellate species. Data from Richter et al. 2018<sup>3</sup>. **(G)** Effects of 2'3'cGAMP on different choanoflagellate species. Choanoflagellates were grown to late-log phase, and treated with increasing concentrations of 2'3'cGAMP. Survival was quantified after 24 hours. 2'3'cGAMP only affected the survival of *M. brevicollis* and *S. macrocollata*, the two sequenced choanoflagellate species with a STING homolog. Data represent mean  $\pm$  SD for three biological replicates. **(H)** Wild type and *STING*<sup>-</sup> cells have similar survival responses to LPS, suggesting that STING is not required for mediating a response to LPS. Wild type and *STING*<sup>-</sup> strains were treated with increasing concentrations of *E. coli* LPS, and survival was quantified after 24 hours. Data represent mean  $\pm$  SD for four biological replicates. Statistical analysis (multiple unpaired t-tests) was performed in GraphPad software. **(I)** STING renders *M. brevicollis* more susceptible to *P. aeruginosa*-induced growth inhibition. Wild type and *STING*<sup>-</sup> cells were exposed to *P. aeruginosa* conditioned media (5% vol/vol), and cell densities were quantified at indicated time points. Data represent mean  $\pm$  SD for three biological replicates. Statistical analysis (multiple unpaired t-tests) was performed in GraphPad software. Dashed line indicates limit of detection.



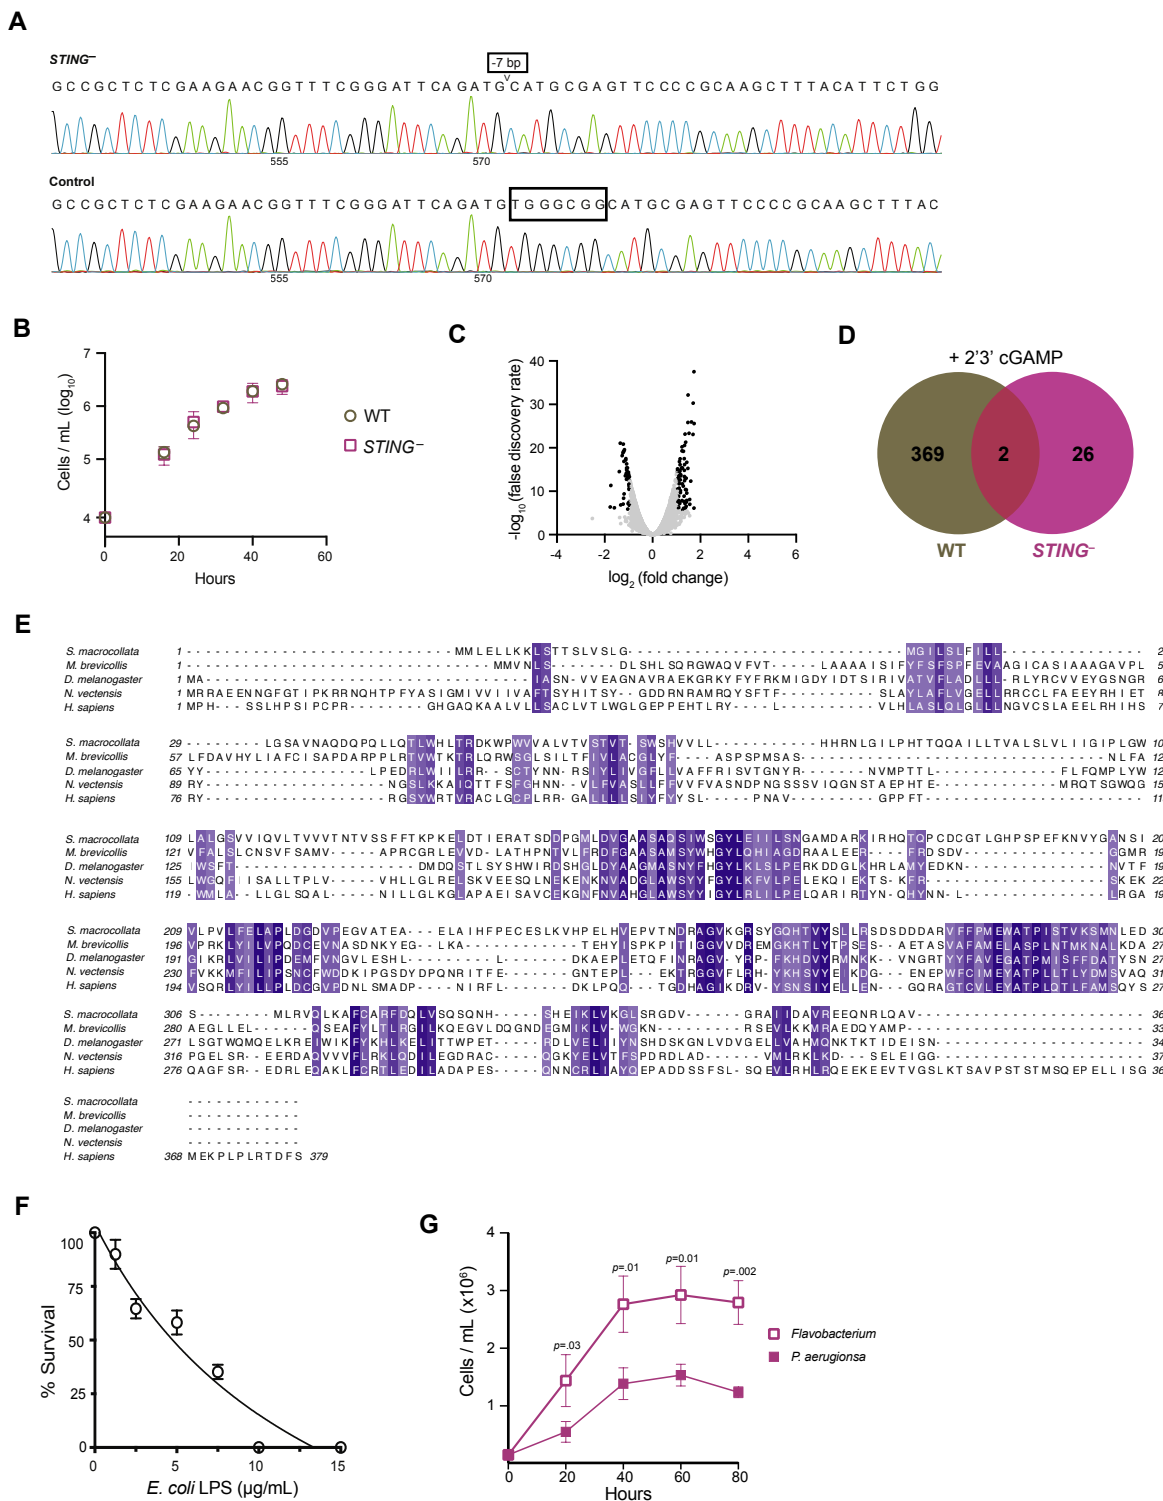

## Supplemental Figure 5. Characterizing *STING*<sup>-</sup> *M. brevicollis*

(A) Sanger sequences of the wild type and *STING*<sup>-</sup> cells at the site of gene editing. *STING*<sup>-</sup> cells have a 7 base-pair deletion that leads to premature stop codons. (B) Growth curves of wild type and *STING*<sup>-</sup> cells indicate that both strains have

similar growth dynamics. Statistical analysis (multiple unpaired t-tests) was performed in GraphPad software. **(C)** Volcano plot displaying RNA-seq differential expression analysis of *STING*<sup>-</sup> cells treated with 100  $\mu$ M 2'3'cGAMP for 3 hours, relative to an untreated control. Genes with a fold change  $\geq 2$  and false discovery rate  $\leq 10e^{-4}$  are depicted by black dots. RNA-seq libraries were prepared from two biological replicates. **(D)** Venn diagram comparing the overlap of genes identified as differentially expressed (FC  $\geq 3$ ; FDR  $\leq 10^{-4}$ ) after treatment with 2'3'cGAMP in wild type and *STING*<sup>-</sup> cells. **(E)** Protein sequence alignment (generated by Clustal Omega multiple sequence alignment) of STING proteins from choanoflagellates *S. macrocollata* and *M. brevicollis* and animals, colored by similarity. **(F)** Dose-response curve of *M. brevicollis* exposed to *E. coli* LPS for 24 hours reveals that LPS leads to cell death in a dose-dependent manner. Data represent mean  $\pm$  SD for four biological replicates. **(G)** *STING*<sup>-</sup> cells were exposed to control *Flavobacterium* or *P. aeruginosa* conditioned medium (5% vol/vol), and cell densities were quantified at indicated time points. Data represent mean  $\pm$  SD for three biological replicates. Statistical analysis (multiple unpaired t-tests) was performed in GraphPad software.

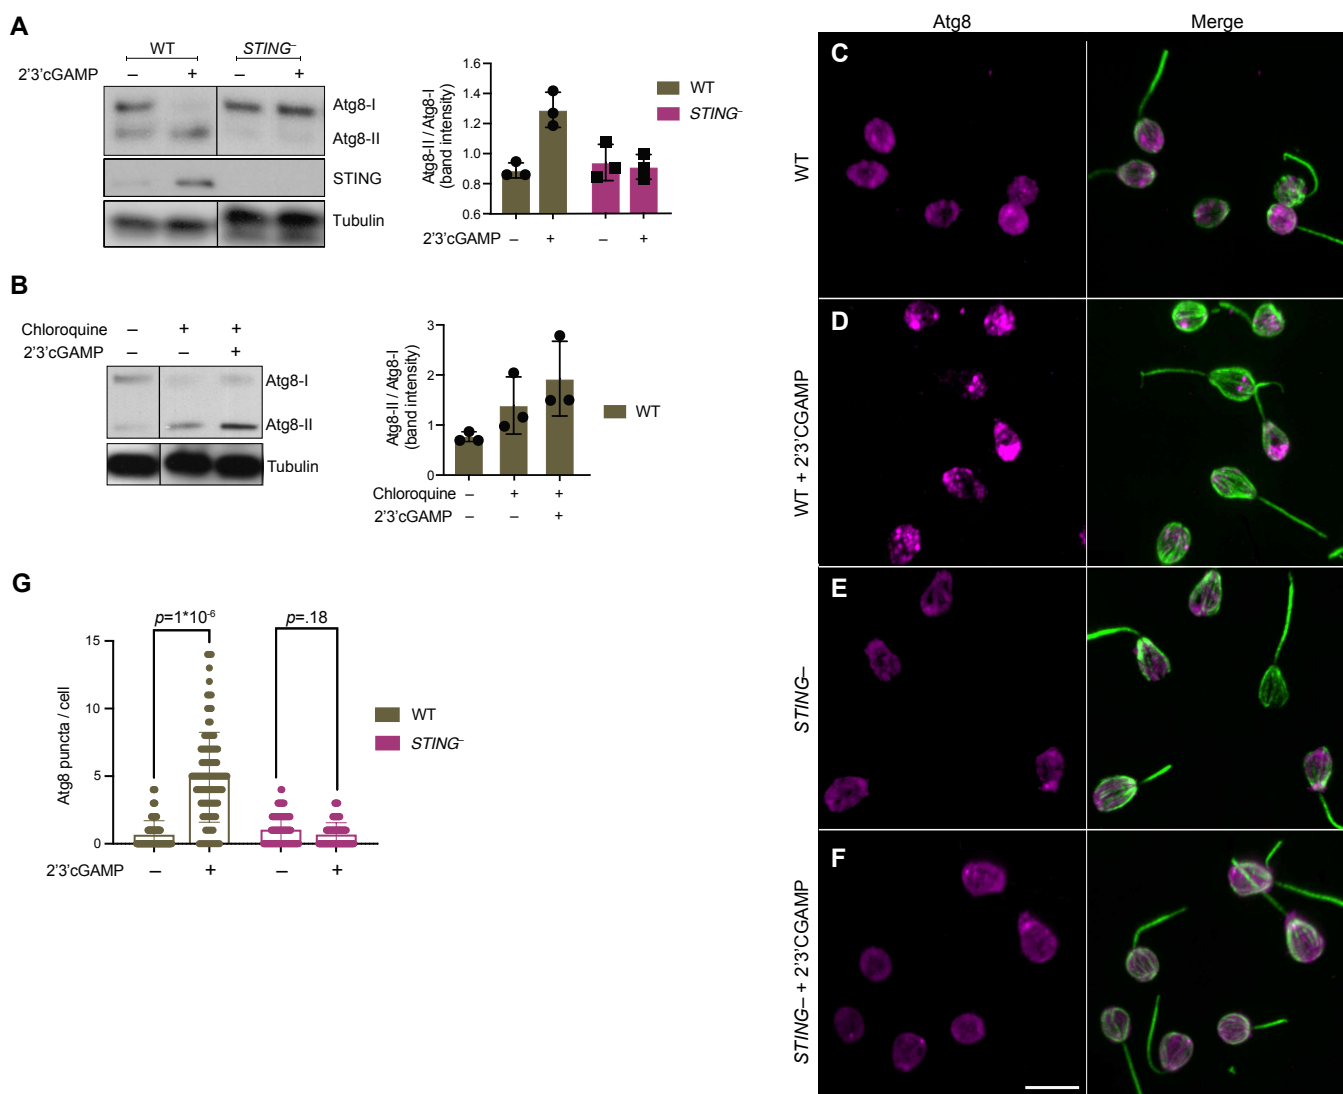

### Figure 6. *STING* mediates 2'3'cGAMP-induced autophagic pathway

**(A)** 2'3'cGAMP-induced Atg8 lipidation requires *STING*. WT and *STING*<sup>-</sup> cells stably expressing mCherry-Atg8 were treated with a vehicle control or 100 μM 2'3'cGAMP for 3 hours, followed by immunoblotting. The band intensity of Atg8-I (unmodified Atg8) and Atg8-II (lipidated Atg8) were quantified for each sample. Relative levels of Atg8 lipidation were assessed by dividing the band intensities of Atg8-II/Atg8-I. Tubulin is shown as loading control. Immunoblot is representative of three biological replicates.

**(B)** 2'3'cGAMP induces Atg8 lipidation in chloroquine-treated wild type cells. WT cells stably expressing mCherry-Atg8 were first incubated with 40 mM chloroquine for 6 hours, and then treated with a vehicle control or 100 μM 2'3'cGAMP for 3 hours in the presence of chloroquine, followed by immunoblotting. For each sample, relative levels of Atg8 lipidation were assessed by dividing the band intensities of Atg8-II/Atg8-I. Tubulin is shown as loading control. Immunoblot is representative of three biological

replicates. For a representative immunoblot and quantification of Atg8-II/Atg8-I levels in chloroquine-treated *STING*<sup>-</sup> cells, refer to Fig. S6B. **(C-G)** *STING* is required for 2'3'cGAMP-induced autophagosome formation. **(C-F)** WT and *STING*<sup>-</sup> cells stably expressing mCherry-Atg8 were treated with a vehicle control or 100 μM 2'3'cGAMP for 3 hours, and then fixed and immunostained. **(C,D)** Representative confocal images of wild type cells show that Atg8 puncta accumulate after 2'3'cGAMP treatment. **(E,F)** Representative confocal images of *STING*<sup>-</sup> cells show that Atg8 remains evenly distributed in the cytoplasm after 2'3'cGAMP treatment. **(G)** The number of Atg8 puncta/cell was quantified for WT and *STING*<sup>-</sup> cells treated with a vehicle control or 2'3'cGAMP for three hours. Data represent cells quantified from two biological replicates (n=150 cells per treatment group). Statistical analyses (unpaired two-tailed t-tests) were performed in GraphPad software.

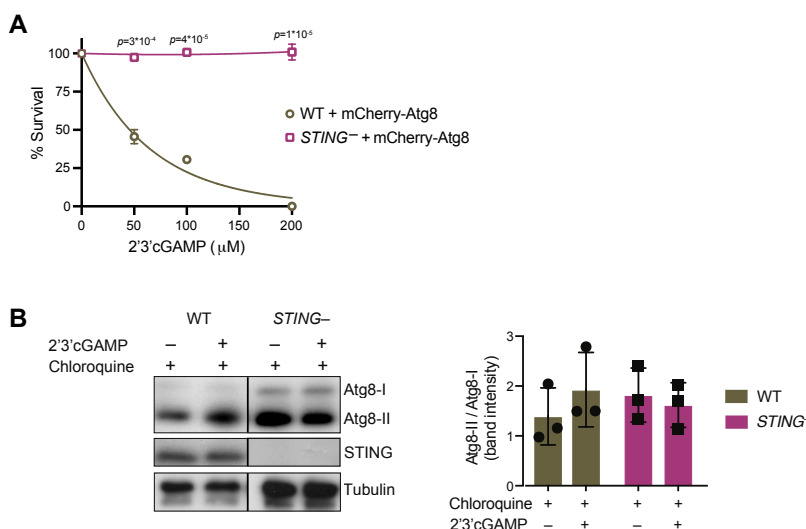

### Supplemental Figure 6. STING mediates 2'3'cGAMP-induced autophagic signaling

**(A)** Overexpression of mCherry-Atg8 does not alter the susceptibility of wild type and *STING*<sup>-</sup> strains to 2'3'cGAMP. Wild type and *STING*<sup>-</sup> strains stably expressing mCherry-Atg8 were treated with increasing concentrations of 2'3'cGAMP, and survival was quantified after 24 hours. Data represent mean +/- SD for two biological replicates. **(B)** 2'3'cGAMP does not induce increased Atg8 lipidation in chloroquine-treated *STING*<sup>-</sup> cells. *STING*<sup>-</sup> cells stably expressing mCherry-Atg8 were incubated with 40 mM chloroquine for 6 hours, and then treated with a vehicle control or 100 µM 2'3'cGAMP for 3 hours in the presence of chloroquine, followed by immunoblotting. For each sample, relative levels of Atg8 lipidation were assessed by dividing the band intensities of Atg8-II/Atg8-I. Tubulin is shown as loading control. Immunoblot is representative of three biological replicates.

**Table 1. Bacteria screened for pathogenic effects**

| <b>Bacterium</b>                       | <b>Pathogenic effects</b> | <b>Reference or details</b> | <b>Source</b>              |
|----------------------------------------|---------------------------|-----------------------------|----------------------------|
| <i>Aeromonas hydrophila</i>            | –                         | Environmental isolate       | This study                 |
| <i>Bacillus aquimaris</i>              | –                         | Environmental isolate       | This study                 |
| <i>Bacillusadius</i>                   | –                         | Mouse isolate               | Julie Pfeiffer             |
| <i>Bacillus cereus</i>                 | –                         | Environmental isolate       | This study                 |
| <i>Bacillus indicus</i>                | –                         | Environmental isolate       | This study                 |
| <i>Bacillus marisflavi</i>             | –                         | Environmental isolate       | This study                 |
| <i>Bacillus pumilus</i>                | –                         | Mouse isolate               | Julie Pfeiffer             |
| <i>Bacillus safensis</i>               | –                         | Mouse isolate               | Julie Pfeiffer             |
| <i>Bacillus subtilis</i>               | –                         | ATCC 6633                   | Julie Pfeiffer             |
| <i>Bacteroides acidifaciens</i>        | –                         | Mouse isolate               | Julie Pfeiffer             |
| <i>Burkholderia multivorans</i>        | –                         | ATCC 17616                  | David Greenberg            |
| <i>Campylobacter jejuni</i> GFP        | –                         | DRH3123                     | David Hendrixson           |
| <i>Deinococcus</i> sp.                 | –                         | Environmental isolate       | This study                 |
| <i>Enterococcus cloacae</i>            | –                         | Mouse isolate               | Julie Pfeiffer             |
| <i>Enterococcus faecium</i>            | –                         | Mouse isolate               | Julie Pfeiffer             |
| <i>Escherichia coli</i> BW25113        | –                         | Datsenko and Wanner, 2000   | David Greenberg            |
| <i>Escherichia coli</i> DH5a GFP       | –                         |                             | David Hendrixson           |
| <i>Escherichia coli</i> ECC-1470       | –                         | Leimbach et al., 2015       | Julie Pfeiffer             |
| <i>Escherichia coli</i> K12            | –                         | ATCC 10798                  | Julie Pfeiffer             |
| <i>Flavobacterium</i> sp.              | –                         | King et al., 2008           | Isolated from ATCC PRA-258 |
| <i>Lactobacillus johnsonii</i>         | –                         | Mouse isolate               | Julie Pfeiffer             |
| <i>Pseudoalteromonas</i> sp.           | –                         | Environmental isolate       | This study                 |
| <i>Pseudomonas aeruginosa</i> PA-14    | +                         | Rahm et al., 1995           | Andrew Koh                 |
| <i>Pseudomonas aeruginosa</i> PAO1     | +                         | ATCC 15692                  | David Greenberg            |
| <i>Pseudomonas aeruginosa</i> PAO1-GFP | +                         | Bloemberg et al., 1997      | David Greenberg            |
| <i>Pseudomonas granadensis</i>         | –                         | Environmental isolate       | This study                 |
| <i>Salmonella enterica</i>             | –                         | Mouse isolate               | Julie Pfeiffer             |
| <i>Staphylococcus aureus</i>           | –                         | ATCC 23235                  | Julie Pfeiffer             |
| <i>Staphylococcus</i> sp.              | –                         | Mouse isolate               | Julie Pfeiffer             |
| <i>Vibrio alginolyticus</i>            | –                         | Environmental isolate       | Kim Orth                   |
| <i>Vibrio furnissii</i>                | –                         | Environmental isolate       | This study                 |
| <i>Vibrio parahaemolyticus</i>         | –                         | Environmental isolate       | This study                 |
| <i>Vibrio parahaemolyticus</i>         | –                         | Environmental isolate       | Kim Orth                   |
| <i>Vibrio ruber</i>                    | –                         | Environmental isolate       | This study                 |
| <i>Vibrio</i> sp.                      | –                         | Environmental isolate       | This study                 |

**Table 2. *P. aeruginosa* deletion strains**

| Strain name | Gene | Putative ORF function                | Effects on <i>M. brevicollis</i> |            |
|-------------|------|--------------------------------------|----------------------------------|------------|
|             |      |                                      | Truncated Flagellum/<br>Settling | Cell Death |
| MPAO1       |      | parent to library stain              | +                                | +          |
| PW5035      | pvdE | pyoverdine biosynthesis protein PvdE | +                                | +          |
| PW5034      | pvdE | pyoverdine biosynthesis protein PvdE | +                                | +          |
| PW1059      | exoT | exoenzyme T                          | +                                | +          |
| PW3078      | toxA | exotoxin A precursor                 | +                                | +          |
| PW3079      | toxA | exotoxin A precursor                 | +                                | +          |
| PW4736      | exoY | adenylate cyclase ExoY               | +                                | +          |
| PW4737      | exoY | adenylate cyclase ExoY               | +                                | +          |
| PW6886      | rhlA | rhamnosyltransferase chain A         | +                                | +          |
| PW6887      | rhlA | rhamnosyltransferase chain A         | +                                | +          |
| PW7478      | exoS | exoenzyme S                          | +                                | +          |
| PW7479      | exoS | exoenzyme S                          | +                                | +          |
| PW7303      | lasB | elastase LasB                        | +                                | +          |
| PW7302      | lasB | elastase LasB                        | +                                | +          |
| PW3252      | aprA | alkaline metalloproteinase precursor | +                                | +          |
| PW3253      | aprA | alkaline metalloproteinase precursor | +                                | +          |
| PW4282      | lasA | LasA protease precursor              | +                                | +          |
| PW4283      | lasA | LasA protease precursor              | +                                | +          |

1. Shabalina, S. A. & Koonin, E. V. Origins and evolution of eukaryotic RNA interference. *Trends Ecol Evol* **23**, 578–587 (2008).
2. Richter, D. J. & Levin, T. C. The origin and evolution of cell-intrinsic antibacterial defenses in eukaryotes. *Curr Opin Genet Dev* **58–59**, 111–122 (2019).
3. Richter, D. J., Fozouni, P., Eisen, M. B. & King, N. Gene family innovation, conservation and loss on the animal stem lineage. *Elife* **7**, 946 (2018).
4. King, N. *et al.* The genome of the choanoflagellate *Monosiga brevicollis* and the origin of metazoans. *Nature* **451**, 783–788 (2008).
5. Brunet, T. & King, N. The Origin of Animal Multicellularity and Cell Differentiation. *Dev Cell* **43**, 124–140 (2017).
6. Richter, D. J. & King, N. The genomic and cellular foundations of animal origins. *Annu Rev Genet* **47**, 509–537 (2013).
7. Leadbeater, B. S. C. *The Choanoflagellates: Evolution, Ecology, and Biology*. (Cambridge University Press, 2015).
8. Dayel, M. J. & King, N. Prey capture and phagocytosis in the choanoflagellate *Salpingoeca rosetta*. *Plos One* **9**, e95577 (2014).
9. Wu, X. *et al.* Molecular evolutionary and structural analysis of the cytosolic DNA sensor cGAS and STING. *Nucleic Acids Res* **42**, 8243–8257 (2014).
10. Levin, T. C., Greaney, A. J., Wetzel, L. & King, N. The Rosetteless gene controls development in the choanoflagellate *S. rosetta*. *Elife* **3**, (2014).
11. Ablasser, A. & Chen, Z. J. cGAS in action: Expanding roles in immunity and inflammation. *Science* **363**, eaat8657 (2019).
12. Ahn, J. & Barber, G. N. STING signaling and host defense against microbial infection. *Exp Mol Medicine* **51**, 1–10 (2019).
13. Margolis, S. R., Wilson, S. C. & Vance, R. E. Evolutionary Origins of cGAS-STING Signaling. *Trends Immunol* **38**, 733–743 (2017).
14. Kranzusch, P. J. *et al.* Ancient Origin of cGAS-STING Reveals Mechanism of Universal 2',3' cGAMP Signaling. *Mol Cell* **59**, 891–903 (2015).
15. Ishikawa, H. & Barber, G. N. STING is an endoplasmic reticulum adaptor that facilitates innate immune signalling. *Nature* **455**, 674–678 (2008).



16. Sun, L., Wu, J., Du, F., Chen, X. & Chen, Z. J. Cyclic GMP-AMP Synthase Is a Cytosolic DNA Sensor That Activates the Type I Interferon Pathway. *Science* **339**, 786–791 (2013).
17. Burdette, D. L. *et al.* STING is a direct innate immune sensor of cyclic di-GMP. *Nature* **478**, 515–518 (2011).
18. Diner, E. J. *et al.* The Innate Immune DNA Sensor cGAS Produces a Noncanonical Cyclic Dinucleotide that Activates Human STING. *Cell Reports* **3**, 1355–1361 (2013).
19. Gao, P. *et al.* Cyclic [G(2',5')pA(3',5')p] Is the Metazoan Second Messenger Produced by DNA-Activated Cyclic GMP-AMP Synthase. *Cell* **153**, 1094–1107 (2013).
20. Ablasser, A. *et al.* cGAS produces a 2'-5'-linked cyclic dinucleotide second messenger that activates STING. *Nature* **498**, 380–384 (2013).
21. Moretti, J. *et al.* STING Senses Microbial Viability to Orchestrate Stress-Mediated Autophagy of the Endoplasmic Reticulum. *Cell* **171**, 809-823.e13 (2017).
22. Burroughs, A. M. & Aravind, L. Identification of Uncharacterized Components of Prokaryotic Immune Systems and Their Diverse Eukaryotic Reformulations. *J Bacteriol* **202**, (2020).
23. Alegado, R. A. *et al.* A bacterial sulfonolipid triggers multicellular development in the closest living relatives of animals. *Elife* **1**, e00013 (2012).
24. Brunet, T. *et al.* A flagellate-to-amoeboid switch in the closest living relatives of animals. *Elife* **10**, e61037 (2021).
25. Dayel, M. J. *et al.* Cell differentiation and morphogenesis in the colony-forming choanoflagellate *Salpingoeca rosetta*. *Dev Biol* **357**, 73–82 (2011).
26. Woznica, A., Gerdt, J. P., Hulett, R. E., Clardy, J. & King, N. Mating in the Closest Living Relatives of Animals Is Induced by a Bacterial Chondroitinase. *Cell* **170**, 1175–1183.e11 (2017).
27. Brunet, T. *et al.* Light-regulated collective contractility in a multicellular choanoflagellate. *Science* **366**, 326–334 (2019).
28. Laundon, D., Larson, B. T., McDonald, K., King, N. & Burkhardt, P. The architecture of cell differentiation in choanoflagellates and sponge choanocytes. *Plos Biol* **17**, e3000226 (2019).
29. Woznica, A. *et al.* Bacterial lipids activate, synergize, and inhibit a developmental switch in choanoflagellates. *Proc National Acad Sci* **113**, 7894–7899 (2016).

30. Ireland, E. V., Woznica, A. & King, N. Synergistic Cues from Diverse Bacteria Enhance Multicellular Development in a Choanoflagellate. *Appl Environ Microb* **86**, (2020).
31. Hake, K. *et al.* Colonial choanoflagellate isolated from Mono Lake harbors a microbiome. (n.d.) doi:10.1101/2021.03.30.437421.
32. Moradali, M. F., Ghods, S. & Rehm, B. H. A. *Pseudomonas aeruginosa* Lifestyle: A Paradigm for Adaptation, Survival, and Persistence. *Front Cell Infect Mi* **7**, 39 (2017).
33. Mahajan-Miklos, S., Tan, M.-W., Rahme, L. G. & Ausubel, F. M. Molecular Mechanisms of Bacterial Virulence Elucidated Using a *Pseudomonas aeruginosa*–*Caenorhabditis elegans* Pathogenesis Model. *Cell* **96**, 47–56 (1999).
34. Pukatzki, S., Kessin, R. H. & Mekalanos, J. J. The human pathogen *Pseudomonas aeruginosa* utilizes conserved virulence pathways to infect the social amoeba *Dictyostelium discoideum*. *Proc National Acad Sci* **99**, 3159–3164 (2002).
35. Rahme, L. G. *et al.* Use of model plant hosts to identify *Pseudomonas aeruginosa* virulence factors. *Proc National Acad Sci* **94**, 13245–13250 (1997).
36. Uribe-Querol, E. & Rosales, C. Control of Phagocytosis by Microbial Pathogens. *Front Immunol* **8**, 1368 (2017).
37. Yoon, S. *et al.* *Pseudomonas syringae* evades phagocytosis by animal cells via type III effector-mediated regulation of actin filament plasticity. *Environ Microbiol* **20**, 3980–3991 (2018).
38. Klockgether, J. & Tümmler, B. Recent advances in understanding *Pseudomonas aeruginosa* as a pathogen. *F1000research* **6**, 1261 (2017).
39. Tanaka, Y. & Chen, Z. J. STING Specifies IRF3 Phosphorylation by TBK1 in the Cytosolic DNA Signaling Pathway. *Sci Signal* **5**, ra20–ra20 (2012).
40. Liu, S. *et al.* Phosphorylation of innate immune adaptor proteins MAVS, STING, and TRIF induces IRF3 activation. *Science* **347**, aaa2630 (2015).
41. Zhang, C. *et al.* Structural basis of STING binding with and phosphorylation by TBK1. *Nature* **567**, 394–398 (2019).
42. Abe, T. & Barber, G. N. Cytosolic-DNA-Mediated, STING-Dependent Proinflammatory Gene Induction Necessitates Canonical NF- $\kappa$ B Activation through TBK1. *J Virol* **88**, 5328–5341 (2014).
43. Gui, X. *et al.* Autophagy induction via STING trafficking is a primordial function of the cGAS pathway. *Nature* **567**, 262–266 (2019).

44. Yamashiro, L. H. *et al.* Interferon-independent STING signaling promotes resistance to HSV-1 in vivo. *Nat Commun* **11**, 3382 (2020).
45. Prabakaran, T. *et al.* Attenuation of cGAS-STING signaling is mediated by a p62/SQSTM1-dependent autophagy pathway activated by TBK1. *Embo J* **37**, (2018).
46. Mann, C. C. de O. *et al.* Modular Architecture of the STING C-Terminal Tail Allows Interferon and NF- $\kappa$ B Signaling Adaptation. *Cell Reports* **27**, 1165-1175.e5 (2019).
47. Watson, R. O. *et al.* The Cytosolic Sensor cGAS Detects Mycobacterium tuberculosis DNA to Induce Type I Interferons and Activate Autophagy. *Cell Host Microbe* **17**, 811–819 (2015).
48. Booth, D. S., Szmidt-Middleton, H. & King, N. Choanoflagellate transfection illuminates their cell biology and the ancestry of animal septins. *Mol Biol Cell* **29**, mbcE18080514 (2018).
49. Dobbs, N. *et al.* STING Activation by Translocation from the ER Is Associated with Infection and Autoinflammatory Disease. *Cell Host Microbe* **18**, 157–168 (2015).
50. Booth, D. S. & King, N. Genome editing enables reverse genetics of multicellular development in the choanoflagellate *Salpingoeca rosetta*. *Elife* **9**, e56193 (2020).
51. Liu, Y. *et al.* Inflammation-Induced, STING-Dependent Autophagy Restricts Zika Virus Infection in the Drosophila Brain. *Cell Host Microbe* **24**, 57-68.e3 (2018).
52. Klionsky, D. J. *et al.* Guidelines for the use and interpretation of assays for monitoring autophagy (4th edition) 1. *Autophagy* **17**, 1–382 (2021).
53. Tanida, I., Minematsu-Ikeguchi, N., Ueno, T. & Kominami, E. Lysosomal Turnover, but Not a Cellular Level, of Endogenous LC3 is a Marker for Autophagy. *Autophagy* **1**, 84–91 (2005).
54. McFarland, A. P. *et al.* Sensing of Bacterial Cyclic Dinucleotides by the Oxidoreductase RECON Promotes NF- $\kappa$ B Activation and Shapes a Proinflammatory Antibacterial State. *Immunity* **46**, 433–445 (2017).
55. Margolis, S. R. *et al.* The STING ligand 2'3'-cGAMP induces an NF- $\kappa$ B-dependent anti-bacterial innate immune response in the starlet sea anemone *Nematostella vectensis*. *bioRxiv* (2021).
56. Schindelin, J. *et al.* Fiji: an open-source platform for biological-image analysis. *Nat Methods* **9**, 676–682 (2012).
57. Kim, D. *et al.* TopHat2: accurate alignment of transcriptomes in the presence of insertions, deletions and gene fusions. *Genome Biol* **14**, R36 (2013).

58. Liao, Y., Smyth, G. K. & Shi, W. featureCounts: an efficient general purpose program for assigning sequence reads to genomic features. *Bioinformatics* **30**, 923–930 (2014).
59. Robinson, M. D., McCarthy, D. J. & Smyth, G. K. edgeR: a Bioconductor package for differential expression analysis of digital gene expression data. *Bioinformatics* **26**, 139–140 (2010).
60. Peng, D., Kurup, S. P., Yao, P. Y., Minning, T. A. & Tarleton, R. L. CRISPR-Cas9-Mediated Single-Gene and Gene Family Disruption in *Trypanosoma cruzi*. *Mbio* **6**, e02097-14 (2015).
